# Supplementary material
Source: publisher figshare collection journal article supplement (https://acs.figshare.com/ndownloader/files/5337229)
Supplement: Supplementary file 1 [file 5337229]

#------------------ SECTION 1. GLOBAL INFORMATION ---------------------------#
 
data_global
 
#------------------ SUBMISSION DETAILS --------------------------------------#
 
# Name and address of author for correspondence
 
_publ_contact_author_name      'Eichhorn, David M.'
_publ_contact_author_address
;
Department of Chemistry
Wichita State University
1845 Fairmount
Wichita, KS 67260-0051
;
_publ_contact_author_email       david.eichhorn@wichita.edu
_publ_contact_author_fax         '316-978-3431'
_publ_contact_author_phone       '316-978-7367'
 
_publ_requested_journal          'Inorganic Chemistry'
_publ_requested_coeditor_name    ?

   
 

#------------------ TITLE AND AUTHOR LIST------------------------------------#
 
_publ_section_title

;Cyanoscorpionates - Crystallographic Characterization
of 1-D Cu(I) Coordination Polymers
;
 
_publ_section_title_footnote
;
?
;
 
loop_
_publ_author_name
_publ_author_address
'Zhao, Ningfeng'
;
Department of Chemistry
Wichita State University
1845 Fairmount
Wichita, KS 67260-0051
;
'Van Stipdonk, Michael J.'
;
Department of Chemistry
Wichita State University
1845 Fairmount
Wichita, KS 67260-0051
;
'Stern, Charlotte L.'
;
Department of Chemistry
Northwestern University
2145 Sheridan Rd.
Evanston, IL 60208
;
'Eichhorn, David M.'
;
Department of Chemistry
Wichita State University
1845 Fairmount
Wichita, KS 67260-0051
;
 
_publ_section_references
;
 Allen, F.H., Kennard, O. & Taylor, R. (1983).
   Acc. Chem. Res.  16, 146-153.
 
 Altomare, A., Cascarano, G., Giacovazzo, C. & Guagliardi, A.
   (1993) J. Appl. Cryst. 26, 343-350.
 
 Altomare, A. Burla, M. C., Camalli, M., Cascarano, G. L.,
 Giacovazzo, C., Guagliardi, A., Moliterni, A. G. G., Polidori, G.
 & Spagna, R. (1999) J. Appl. Cryst. 32, 115-119.
 
 Blessing, R. H. (1995) Acta Cryst., A51, 33-38.
 
 Blessing, R. H. (1987) Cryst. Rev. 1, 3-58.
 
 Blessing, R. H. (1989) J. Appl. Cryst. 22, 396-397.
 
 Beurskens, P.T., Beurskens, G., de Gelder, R.,
   Garci\'ia-Granda, S., Gould, R.O., Israel, R. & Smits, J.M.M.
   (1999) The DIRDIF-99 program system,
   Technical Report of the Crystallography Laboratory,
   University of Nijmegen, The Netherlands.
 
 Cremer, D. & Pople, J.A. (1975). J. Am. Chem. Soc. 97, 1354-1358.
 
 Enraf-Nonius (1994). CAD4Express Software. Enraf-Nonius, Delft,
   The Netherlands.
 
 Farrugia, L. J. (1997) ORTEP-3 for Windows, J. Appl. Cryst. 30, 565.
 
 Farrugia, L. J. (1999) WinGX, J. Appl. Cryst. 32, 837-838.
 
 Flack, H.D. (1983). Acta Cryst. A39, 876-881.
 
 Harms, K. & Wocadlo, S. (1995) XCAD-4. Program for Processing CAD-4
 Diffractometer Data. University of Marburg, Germany.
 
 Johnson, C.K. (1965). ORTEP. Report ORNL-3794. Oak Ridge National
 Laboratory, Tennessee, USA.
 
 Lehman, M. S. and Larsen, F. K. (1974) Acta. Cryst. A30, 580
 
 LePage, Y. (1987). J. Appl. Cryst. 20, 264-269.
 
 North, A. C. T., Phillips, D. C. & Mathews, F. S. (1968) Acta Cryst,
 A24, 351-359
 
 Orpen, A. G., Brammer, L., Allen, F. H., Kennard, O., Watson, D. G.,
 & Taylor, R. (1992). International Tables for Crystallography,
 Volume C.
 
 Sheldrick, G.M. (1993) SHELXL93. Program for crystal structure
   refinement. University of G\"ottingen, Germany.
 
 Sheldrick, G.M. (1997) SHELXL97. Program for crystal structure
   refinement. University of G\"ottingen, Germany.
 
 Sheldrick, G.M. (1985). SHELXS86. In Crystallographic Computing 3,
 edited by G. M. Sheldrick, C. Kruger & R. Goddard, pp. 175-189.
 Oxford University Press.
 
 Sheldrick, G.M. (1997) SHELXS97. Program for Crystal Structure solution.
   University of G\"ottingen, Germany.
 
 Spek, A.L. (1990). Acta Cryst. A46, C34
 
 Streltsov, V. A. & Zavodnik, V. E. (1989) Sov. Phys. Crystallogr.
 34, 824-828
 
 Streltsov, V. A. & Zavodnik, V. E. (1990) Sov. Phys. Crystallogr.
 35, 281.
 
 Walker, N. &  Stuart, D. (1983). Acta Cryst., A39, 158 - 166.
 
 Wilson, A.J.C. (1992) Ed. International Tables for Crystallography,
   Volume C, Kluwer Academic Publishers, Dordrecht, The Netherlands.
;

#------------------  SECTION 2. COMPOUND(S) DETAILS -------------------------#
 
data_s95q1m
 
_audit_creation_date                    2005-10-14T17:04:55-00:00
_audit_creation_method                  'WinGX routine CIF_UPDATE'
 
#------------------ CHEMICAL INFORMATION ------------------------------------#
 
_chemical_formula_moiety                'C24 H31 B1 N9 Tl1'
_chemical_formula_sum                   'C24 H31 B1 N9 Tl1'
_chemical_formula_weight                660.76
_chemical_absolute_configuration        ad
 
#------------------ UNIT CELL INFORMATION -----------------------------------#
 
_symmetry_cell_setting                  trigonal
_symmetry_space_group_name_H-M          'R 3 m'
loop_
    _symmetry_equiv_pos_as_xyz
'x, y, z'
'-y, x-y, z'
'-x+y, -x, z'
'-x+y, y, z'
'x, x-y, z'
'-y, -x, z'
'x+2/3, y+1/3, z+1/3'
'-y+2/3, x-y+1/3, z+1/3'
'-x+y+2/3, -x+1/3, z+1/3'
'-x+y+2/3, y+1/3, z+1/3'
'x+2/3, x-y+1/3, z+1/3'
'-y+2/3, -x+1/3, z+1/3'
'x+1/3, y+2/3, z+2/3'
'-y+1/3, x-y+2/3, z+2/3'
'-x+y+1/3, -x+2/3, z+2/3'
'-x+y+1/3, y+2/3, z+2/3'
'x+1/3, x-y+2/3, z+2/3'
'-y+1/3, -x+2/3, z+2/3'
 
_cell_length_a                          16.8644(10)
_cell_length_b                          16.8644(10)
_cell_length_c                          8.1583(10)
_cell_angle_alpha                       90
_cell_angle_beta                        90
_cell_angle_gamma                       120
_cell_volume                            2009.4(3)
_cell_formula_units_Z                   3
_cell_measurement_temperature           153(2)
_cell_measurement_reflns_used           6330
_cell_measurement_theta_min             2.42
_cell_measurement_theta_max             28.37
 
#------------------ CRYSTAL INFORMATION -------------------------------------#
 
_exptl_crystal_description              prism
_exptl_crystal_colour                   colorless
_exptl_crystal_size_max                 0.63
_exptl_crystal_size_mid                 0.18
_exptl_crystal_size_min                 0.16
_exptl_crystal_density_diffrn           1.638
_exptl_crystal_density_method           'not measured'
_exptl_crystal_F_000                    945
_exptl_absorpt_coefficient_mu           6.057
_exptl_absorpt_correction_type          analytical
_exptl_absorpt_correction_T_min   0.1525 
_exptl_absorpt_correction_T_max   0.4225 
 
#------------------ DATA COLLECTION INFORMATION -----------------------------#
 
_diffrn_measurement_device_type  'Bruker SMART 1000'
_diffrn_measurement_method       'omega scans'
_diffrn_detector_area_resol_mean ?
_diffrn_standards_number         ?
_diffrn_standards_interval_count ?
_diffrn_standards_decay_%        ?
_diffrn_radiation_wavelength            0.71073
_diffrn_radiation_type                  MoK\a
_diffrn_radiation_probe                 x-ray
_diffrn_reflns_number                   7073
_diffrn_reflns_av_R_equivalents         0.0701
_diffrn_reflns_limit_h_min              -22
_diffrn_reflns_limit_h_max              22
_diffrn_reflns_limit_k_min              -21
_diffrn_reflns_limit_k_max              21
_diffrn_reflns_limit_l_min              -10
_diffrn_reflns_limit_l_max              10
_diffrn_reflns_theta_min                2.42
_diffrn_reflns_theta_max                28.89
_diffrn_reflns_theta_full               28.89
_diffrn_measured_fraction_theta_max
                                        0.968
_diffrn_measured_fraction_theta_full
                                        0.968
_reflns_number_total                    1215
_reflns_number_gt                       1197
_reflns_threshold_expression            >2sigma(I)
 
#------------------ COMPUTER PROGRAMS USED ----------------------------------#
 
_computing_data_collection              'Bruker SMART'
_computing_cell_refinement              'Bruker SMART'
_computing_data_reduction               'Bruker SAINT'
_computing_structure_solution           'SIR92 (Giacovazzo et al, 1993)'
_computing_structure_refinement         'SHELXL-97 (Sheldrick, 1997)'
_computing_molecular_graphics           'Ortep-3 for Windows (Farrugia, 1997)'
_computing_publication_material
                                   'WinGX publication routines (Farrugia, 1999)'
 
#------------------ REFINEMENT INFORMATION ----------------------------------#
 
_refine_ls_structure_factor_coef        Fsqd
_refine_ls_matrix_type                  full
_refine_ls_weighting_scheme             calc
_refine_ls_weighting_details
         'calc w=1/[\s^2^(Fo^2^)+(0.0116P)^2^+0.0000P] where P=(Fo^2^+2Fc^2^)/3'
_refine_ls_hydrogen_treatment           noref
_refine_ls_extinction_method            none
_refine_ls_number_reflns                1215
_refine_ls_number_parameters            71
_refine_ls_number_restraints            1
_refine_ls_R_factor_gt                  0.0246
_refine_ls_wR_factor_ref                0.0499
_refine_ls_goodness_of_fit_ref          1.064
_refine_ls_restrained_S_all             1.063
_refine_ls_shift/su_max                 0.001
_refine_ls_abs_structure_details
                                    'Flack H D (1983), Acta Cryst. A39, 876-881'
_refine_ls_abs_structure_Flack          0.025(13)
_refine_diff_density_max                0.844
_refine_diff_density_min                -2.335
 
#------------------ ATOMIC TYPES, COORDINATES AND THERMAL PARAMETERS --------#
 
loop_
    _atom_type_symbol
    _atom_type_description
    _atom_type_scat_dispersion_real
    _atom_type_scat_dispersion_imag
    _atom_type_scat_source
C C 0.0033 0.0016 'International Tables Vol C Tables 4.2.6.8 and 6.1.1.4'
H H 0 0 'International Tables Vol C Tables 4.2.6.8 and 6.1.1.4'
N N 0.0061 0.0033 'International Tables Vol C Tables 4.2.6.8 and 6.1.1.4'
Tl Tl -2.8358 9.6688 'International Tables Vol C Tables 4.2.6.8 and 6.1.1.4'
B B 0.0013 0.0007 'International Tables Vol C Tables 4.2.6.8 and 6.1.1.4'
 
loop_
    _atom_site_label
    _atom_site_type_symbol
    _atom_site_fract_x
    _atom_site_fract_y
    _atom_site_fract_z
    _atom_site_U_iso_or_equiv
    _atom_site_adp_type
    _atom_site_occupancy
    _atom_site_calc_flag
    _atom_site_refinement_flags
    _atom_site_disorder_group
    _atom_site_disorder_assembly
C4 C 0.1433(2) 0.2866(5) 0.9399(10) 0.0359(16) Uani 1 d S . .
N1 N 0.05063(15) 0.1013(3) 1.2360(5) 0.0250(9) Uani 1 d S . .
C3 C 0.11199(18) 0.2240(4) 1.0855(7) 0.0257(10) Uani 1 d S . .
C7 C 0.1707(2) 0.3413(4) 1.3209(9) 0.0404(13) Uani 1 d S . .
C5 C 0.0991(5) 0.3466(4) 0.9413(8) 0.0680(17) Uani 1 d . . .
H5A H 0.0337 0.3085 0.9364 0.102 Uiso 1 calc R . .
H5B H 0.12 0.3868 0.8482 0.102 Uiso 1 calc R . .
H5C H 0.1158 0.3822 1.0401 0.102 Uiso 1 calc R . .
C2 C 0.12548(18) 0.2510(4) 1.2527(7) 0.0301(11) Uani 1 d S . .
N2 N 0.06623(15) 0.1325(3) 1.0766(5) 0.0253(8) Uani 1 d S . .
C1 C 0.08579(18) 0.1716(4) 1.3414(6) 0.0284(10) Uani 1 d S . .
H1 H 0.0836 0.1672 1.4551 0.034 Uiso 1 calc SR . .
N3 N 0.2068(3) 0.4137(5) 1.3759(13) 0.063(3) Uani 1 d S . .
C6 C 0.1160(2) 0.2321(4) 0.7774(8) 0.0437(15) Uani 1 d S . .
B B 0 0 1.2897(12) 0.0223(18) Uani 1 d S . .
H0 H 0 0 1.4099 0.027 Uiso 1 calc SR . .
Tl Tl 0 0 0.8435 0.02840(9) Uani 1 d S . .
H6A H 0.1371 0.274 0.6867 0.043 Uiso 1 d S . .
H6B H 0.0506 0.1943 0.7721 0.043 Uiso 1 d . . .
 
loop_
    _atom_site_aniso_label
    _atom_site_aniso_U_11
    _atom_site_aniso_U_22
    _atom_site_aniso_U_33
    _atom_site_aniso_U_23
    _atom_site_aniso_U_13
    _atom_site_aniso_U_12
C4 0.044(3) 0.025(4) 0.032(4) 0.001(3) 0.0005(15) 0.0124(18)
N1 0.0283(15) 0.030(2) 0.017(2) 0.0004(15) 0.0002(8) 0.0150(11)
C3 0.0233(18) 0.026(3) 0.029(3) 0.000(2) 0.0001(10) 0.0131(13)
C7 0.043(3) 0.036(3) 0.040(4) -0.008(3) -0.0040(14) 0.0179(16)
C5 0.115(5) 0.062(3) 0.055(4) 0.013(3) 0.009(3) 0.065(4)
C2 0.0290(19) 0.028(3) 0.033(3) -0.007(2) -0.0037(10) 0.0138(13)
N2 0.0302(16) 0.028(2) 0.017(2) 0.0021(15) 0.0011(8) 0.0138(11)
C1 0.0318(19) 0.033(3) 0.021(3) -0.0056(19) -0.0028(9) 0.0166(13)
N3 0.058(3) 0.038(4) 0.086(8) -0.022(4) -0.011(2) 0.019(2)
C6 0.061(3) 0.037(3) 0.026(3) 0.005(2) 0.0027(12) 0.0184(16)
B 0.027(3) 0.027(3) 0.013(4) 0 0 0.0135(13)
Tl 0.03506(12) 0.03506(12) 0.01507(13) 0 0 0.01753(6)
 
 
#------------------ MOLECULAR GEOMETRY --------------------------------------#
 
_geom_special_details
;
 All esds (except the esd in the dihedral angle between two l.s. planes)
 are estimated using the full covariance matrix.  The cell esds are taken
 into account individually in the estimation of esds in distances, angles
 and torsion angles; correlations between esds in cell parameters are only
 used when they are defined by crystal symmetry.  An approximate (isotropic)
 treatment of cell esds is used for estimating esds involving l.s. planes.
;
loop_
    _geom_bond_atom_site_label_1
    _geom_bond_atom_site_label_2
    _geom_bond_distance
    _geom_bond_site_symmetry_2
    _geom_bond_publ_flag
C4 C3 1.499(8) . ?
C4 C5 1.528(7) 4 ?
C4 C5 1.528(7) . ?
C4 C6 1.546(11) . ?
N1 C1 1.339(7) . ?
N1 N2 1.378(6) . ?
N1 B 1.543(5) . ?
C3 N2 1.338(7) . ?
C3 C2 1.420(8) . ?
C7 N3 1.148(9) . ?
C7 C2 1.433(8) . ?
C2 C1 1.366(8) . ?
N2 Tl 2.713(4) . ?
B N1 1.543(5) 3 ?
B N1 1.543(5) 2 ?
Tl N2 2.713(4) 2 ?
Tl N2 2.713(4) 3 ?
 
loop_
    _geom_angle_atom_site_label_1
    _geom_angle_atom_site_label_2
    _geom_angle_atom_site_label_3
    _geom_angle
    _geom_angle_site_symmetry_1
    _geom_angle_site_symmetry_3
    _geom_angle_publ_flag
C3 C4 C5 110.1(4) . 4 ?
C3 C4 C5 110.1(4) . . ?
C5 C4 C5 110.0(7) 4 . ?
C3 C4 C6 111.4(5) . . ?
C5 C4 C6 107.6(5) 4 . ?
C5 C4 C6 107.6(5) . . ?
C1 N1 N2 110.6(4) . . ?
C1 N1 B 123.6(5) . . ?
N2 N1 B 125.8(5) . . ?
N2 C3 C2 109.2(5) . . ?
N2 C3 C4 124.5(5) . . ?
C2 C3 C4 126.3(5) . . ?
N3 C7 C2 179.8(8) . . ?
C1 C2 C3 105.9(5) . . ?
C1 C2 C7 125.2(5) . . ?
C3 C2 C7 129.0(6) . . ?
C3 N2 N1 106.2(4) . . ?
C3 N2 Tl 138.6(4) . . ?
N1 N2 Tl 115.2(3) . . ?
N1 C1 C2 108.1(5) . . ?
N1 B N1 112.3(3) 3 2 ?
N1 B N1 112.3(3) 3 . ?
N1 B N1 112.3(3) 2 . ?
N2 Tl N2 76.27(13) . 2 ?
N2 Tl N2 76.27(13) . 3 ?
N2 Tl N2 76.27(13) 2 3 ?
 
#===END
#------------------  SECTION 2. COMPOUND(S) DETAILS -------------------------#
 
data_pz0037_1_0m 
 
_audit_creation_method            SHELXL-97 
_chemical_name_systematic 
; 
 ? 
; 
_chemical_name_common             ? 
_chemical_melting_point           ? 
_chemical_formula_moiety          ? 
_chemical_formula_sum 
 'C30 H19 B Cu N9' 
_chemical_formula_weight          579.89 
 
loop_ 
 _atom_type_symbol 
 _atom_type_description 
 _atom_type_scat_dispersion_real 
 _atom_type_scat_dispersion_imag 
 _atom_type_scat_source 
 'C'  'C'   0.0033   0.0016 
 'International Tables Vol C Tables 4.2.6.8 and 6.1.1.4' 
 'H'  'H'   0.0000   0.0000 
 'International Tables Vol C Tables 4.2.6.8 and 6.1.1.4' 
 'B'  'B'   0.0013   0.0007 
 'International Tables Vol C Tables 4.2.6.8 and 6.1.1.4' 
 'N'  'N'   0.0061   0.0033 
 'International Tables Vol C Tables 4.2.6.8 and 6.1.1.4' 
 'Cu'  'Cu'   0.3201   1.2651 
 'International Tables Vol C Tables 4.2.6.8 and 6.1.1.4' 
 
_symmetry_cell_setting            'monoclinic' 
_symmetry_space_group_name_H-M    'P1 21/n 1'
 
loop_ 
 _symmetry_equiv_pos_as_xyz 
 'x, y, z' 
 '-x+1/2, y+1/2, -z+1/2' 
 '-x, -y, -z' 
 'x-1/2, -y-1/2, z-1/2' 
 
_cell_length_a                    9.5640(6) 
_cell_length_b                    24.3600(14) 
_cell_length_c                    11.4620(7) 
_cell_angle_alpha                 90.00 
_cell_angle_beta                  92.564(3) 
_cell_angle_gamma                 90.00 
_cell_volume                      2667.7(3) 
_cell_formula_units_Z             4 
_cell_measurement_temperature     150(2) 
_cell_measurement_reflns_used     ? 
_cell_measurement_theta_min       ? 
_cell_measurement_theta_max       ? 
 
_exptl_crystal_description        prism 
_exptl_crystal_colour             yellow 
_exptl_crystal_size_max           0.55 
_exptl_crystal_size_mid           0.28 
_exptl_crystal_size_min           0.21 
_exptl_crystal_density_meas       ? 
_exptl_crystal_density_diffrn     1.444 
_exptl_crystal_density_method     'not measured' 
_exptl_crystal_F_000              1184 
_exptl_absorpt_coefficient_mu     0.858 
_exptl_absorpt_correction_type    analytical
_exptl_absorpt_correction_T_min   0.6498 
_exptl_absorpt_correction_T_max   0.8404 
_exptl_absorpt_process_details    ? 
 
_exptl_special_details 
; 
 ? 
; 
 
_diffrn_ambient_temperature       293(2) 
_diffrn_radiation_wavelength      0.71073 
_diffrn_radiation_type            MoK\a 
_diffrn_radiation_source          'fine-focus sealed tube' 
_diffrn_radiation_monochromator   graphite 
_diffrn_measurement_device_type   'Bruker Kappa APEX2' 
_diffrn_measurement_method        'phi and omega scans' 
_diffrn_detector_area_resol_mean  ? 
_diffrn_standards_number          ? 
_diffrn_standards_interval_count  ? 
_diffrn_standards_interval_time   ? 
_diffrn_standards_decay_%         ? 
_diffrn_reflns_number             68988 
_diffrn_reflns_av_R_equivalents   0.0294 
_diffrn_reflns_av_sigmaI/netI     0.0171 
_diffrn_reflns_limit_h_min        -11 
_diffrn_reflns_limit_h_max        11 
_diffrn_reflns_limit_k_min        -27 
_diffrn_reflns_limit_k_max        30 
_diffrn_reflns_limit_l_min        -14 
_diffrn_reflns_limit_l_max        12 
_diffrn_reflns_theta_min          3.19 
_diffrn_reflns_theta_max          26.00 
_reflns_number_total              5221 
_reflns_number_gt                 4551 
_reflns_threshold_expression      >2sigma(I) 
 
_computing_data_collection        'Bruker APEX2' 
_computing_cell_refinement        'Bruker APEX2' 
_computing_data_reduction         'Bruker SAINT' 
_computing_structure_solution     'SHELXS-97 (Sheldrick, 1990)' 
_computing_structure_refinement   'SHELXL-97 (Sheldrick, 1997)' 
_computing_molecular_graphics     ? 
_computing_publication_material   ? 
 
_refine_special_details 
; 
 Refinement of F^2^ against ALL reflections.  The weighted R-factor wR and 
 goodness of fit S are based on F^2^, conventional R-factors R are based 
 on F, with F set to zero for negative F^2^. The threshold expression of 
 F^2^ > 2sigma(F^2^) is used only for calculating R-factors(gt) etc. and is 
 not relevant to the choice of reflections for refinement.  R-factors based 
 on F^2^ are statistically about twice as large as those based on F, and R- 
 factors based on ALL data will be even larger. 
; 
 
_refine_ls_structure_factor_coef  Fsqd  
_refine_ls_matrix_type            full 
_refine_ls_weighting_scheme       calc  
_refine_ls_weighting_details 
 'calc w=1/[\s^2^(Fo^2^)+(0.0455P)^2^+1.9983P] where P=(Fo^2^+2Fc^2^)/3' 
_atom_sites_solution_primary      direct 
_atom_sites_solution_secondary    difmap 
_atom_sites_solution_hydrogens    geom 
_refine_ls_hydrogen_treatment     noref
_refine_ls_extinction_method      none 
_refine_ls_extinction_coef        ? 
_refine_ls_number_reflns          5221 
_refine_ls_number_parameters      365 
_refine_ls_number_restraints      0 
_refine_ls_R_factor_all           0.0391 
_refine_ls_R_factor_gt            0.0321 
_refine_ls_wR_factor_ref          0.0887 
_refine_ls_wR_factor_gt           0.0841 
_refine_ls_goodness_of_fit_ref    1.029 
_refine_ls_restrained_S_all       1.029 
_refine_ls_shift/su_max           0.001 
_refine_ls_shift/su_mean          0.000 
 
loop_ 
 _atom_site_label 
 _atom_site_type_symbol 
 _atom_site_fract_x 
 _atom_site_fract_y 
 _atom_site_fract_z 
 _atom_site_U_iso_or_equiv 
 _atom_site_adp_type 
 _atom_site_occupancy 
 _atom_site_symmetry_multiplicity 
 _atom_site_calc_flag 
 _atom_site_refinement_flags 
 _atom_site_disorder_assembly 
 _atom_site_disorder_group 
B1 B 1.0057(2) 0.41088(9) 0.17900(18) 0.0233(4) Uani 1 1 d . . . 
H1A H 1.0404 0.4364 0.1209 0.028 Uiso 1 1 calc R . . 
C1 C 0.7513(2) 0.44328(8) 0.11554(16) 0.0268(4) Uani 1 1 d . . . 
H1 H 0.7729 0.4722 0.0667 0.032 Uiso 1 1 calc R . . 
C2 C 0.6185(2) 0.42694(8) 0.14324(17) 0.0273(4) Uani 1 1 d . . . 
C3 C 0.6381(2) 0.38127(8) 0.21817(17) 0.0264(4) Uani 1 1 d . . . 
C4 C 0.4848(2) 0.44807(9) 0.10433(18) 0.0316(5) Uani 1 1 d . . . 
C5 C 0.5365(2) 0.34446(9) 0.27044(19) 0.0313(5) Uani 1 1 d . . . 
C6 C 0.4225(2) 0.36475(11) 0.3269(2) 0.0386(5) Uani 1 1 d . . . 
H6 H 0.4068 0.4024 0.3297 0.046 Uiso 1 1 calc R . . 
C7 C 0.3319(3) 0.32899(12) 0.3794(2) 0.0499(7) Uani 1 1 d . . . 
H7 H 0.2553 0.3426 0.4173 0.060 Uiso 1 1 calc R . . 
C8 C 0.3553(3) 0.27347(13) 0.3754(3) 0.0586(8) Uani 1 1 d . . . 
H8 H 0.2950 0.2496 0.4117 0.070 Uiso 1 1 calc R . . 
C9 C 0.4670(3) 0.25283(12) 0.3183(3) 0.0585(8) Uani 1 1 d . . . 
H9 H 0.4813 0.2151 0.3152 0.070 Uiso 1 1 calc R . . 
C10 C 0.5578(3) 0.28795(10) 0.2654(2) 0.0449(6) Uani 1 1 d . . . 
H10 H 0.6332 0.2739 0.2264 0.054 Uiso 1 1 calc R . . 
C11 C 1.1519(2) 0.46685(8) 0.33184(17) 0.0265(4) Uani 1 1 d . . . 
H11 H 1.1987 0.4889 0.2802 0.032 Uiso 1 1 calc R . . 
C12 C 1.1691(2) 0.46783(8) 0.45243(17) 0.0273(4) Uani 1 1 d . . . 
C13 C 1.0744(2) 0.42818(8) 0.49219(16) 0.0247(4) Uani 1 1 d . . . 
C14 C 1.2633(2) 0.50281(9) 0.51787(19) 0.0345(5) Uiso 1 1 d . . . 
C15 C 1.0387(2) 0.41601(8) 0.61326(17) 0.0269(4) Uani 1 1 d . . . 
C16 C 1.1319(2) 0.42837(10) 0.70627(19) 0.0361(5) Uani 1 1 d . . . 
H16 H 1.2205 0.4416 0.6916 0.043 Uiso 1 1 calc R . . 
C17 C 1.0940(3) 0.42115(10) 0.82054(19) 0.0415(6) Uani 1 1 d . . . 
H17 H 1.1570 0.4297 0.8820 0.050 Uiso 1 1 calc R . . 
C18 C 0.9642(3) 0.40158(10) 0.84311(18) 0.0383(5) Uani 1 1 d . . . 
H18 H 0.9386 0.3972 0.9199 0.046 Uiso 1 1 calc R . . 
C19 C 0.8707(2) 0.38819(9) 0.75191(19) 0.0357(5) Uani 1 1 d . . . 
H19 H 0.7830 0.3742 0.7674 0.043 Uiso 1 1 calc R . . 
C20 C 0.9078(2) 0.39570(9) 0.63770(17) 0.0303(4) Uani 1 1 d . . . 
H20 H 0.8442 0.3870 0.5767 0.036 Uiso 1 1 calc R . . 
C21 C 1.1527(2) 0.33617(8) 0.07827(16) 0.0246(4) Uani 1 1 d . . . 
H21 H 1.1969 0.3588 0.0260 0.030 Uiso 1 1 calc R . . 
C22 C 1.1679(2) 0.27986(8) 0.08729(16) 0.0243(4) Uani 1 1 d . . . 
C23 C 1.0818(2) 0.26387(8) 0.17855(16) 0.0230(4) Uani 1 1 d . . . 
C24 C 0.7533(2) 0.25450(8) 0.52055(17) 0.0268(4) Uani 1 1 d . . . 
C25 C 1.0520(2) 0.20806(8) 0.22040(17) 0.0267(4) Uani 1 1 d . . . 
C26 C 1.0404(2) 0.16435(9) 0.1416(2) 0.0344(5) Uani 1 1 d . . . 
H26 H 1.0540 0.1704 0.0628 0.041 Uiso 1 1 calc R . . 
C27 C 1.0086(3) 0.11213(10) 0.1800(2) 0.0446(6) Uani 1 1 d . . . 
H27 H 1.0008 0.0832 0.1271 0.054 Uiso 1 1 calc R . . 
C28 C 0.9887(3) 0.10309(10) 0.2971(3) 0.0484(6) Uani 1 1 d . . . 
H28 H 0.9681 0.0679 0.3230 0.058 Uiso 1 1 calc R . . 
C29 C 0.9991(3) 0.14586(10) 0.3757(2) 0.0433(6) Uani 1 1 d . . . 
H29 H 0.9846 0.1395 0.4542 0.052 Uiso 1 1 calc R . . 
C30 C 1.0310(2) 0.19819(9) 0.33821(19) 0.0333(5) Uani 1 1 d . . . 
H30 H 1.0386 0.2268 0.3917 0.040 Uiso 1 1 calc R . . 
Cu1 Cu 0.89780(2) 0.331070(10) 0.35924(2) 0.02466(9) Uani 1 1 d . . . 
N1 N 0.77413(17) 0.37198(7) 0.23528(14) 0.0253(4) Uani 1 1 d . . . 
N2 N 0.84345(17) 0.40995(7) 0.17163(13) 0.0243(3) Uani 1 1 d . . . 
N3 N 0.3758(2) 0.46291(8) 0.07442(18) 0.0404(5) Uani 1 1 d . . . 
N4 N 1.00910(16) 0.40389(7) 0.40020(13) 0.0229(3) Uani 1 1 d . . . 
N5 N 1.05698(16) 0.42890(6) 0.30284(13) 0.0223(3) Uani 1 1 d . . . 
N6 N 1.3410(2) 0.53053(9) 0.56805(19) 0.0509(6) Uani 1 1 d . . . 
N7 N 1.02158(16) 0.30830(6) 0.22170(13) 0.0214(3) Uani 1 1 d . . . 
N8 N 1.06352(17) 0.35234(7) 0.15743(13) 0.0215(3) Uani 1 1 d . . . 
N9 N 0.81885(18) 0.28320(7) 0.46641(14) 0.0283(4) Uani 1 1 d . . . 
 
loop_ 
 _atom_site_aniso_label 
 _atom_site_aniso_U_11 
 _atom_site_aniso_U_22 
 _atom_site_aniso_U_33 
 _atom_site_aniso_U_23 
 _atom_site_aniso_U_13 
 _atom_site_aniso_U_12 
B1 0.0285(11) 0.0232(11) 0.0186(10) 0.0028(8) 0.0037(8) 0.0016(9) 
C1 0.0350(11) 0.0241(10) 0.0212(9) 0.0000(8) -0.0012(8) 0.0057(8) 
C2 0.0298(11) 0.0264(10) 0.0251(10) -0.0046(8) -0.0047(8) 0.0071(8) 
C3 0.0275(10) 0.0257(10) 0.0257(10) -0.0058(8) -0.0031(8) 0.0035(8) 
C4 0.0362(12) 0.0284(11) 0.0300(11) 0.0005(9) -0.0010(9) 0.0036(9) 
C5 0.0237(10) 0.0348(12) 0.0344(11) 0.0006(9) -0.0081(9) -0.0014(9) 
C6 0.0299(11) 0.0478(14) 0.0375(12) 0.0046(10) -0.0039(9) 0.0006(10) 
C7 0.0276(12) 0.072(2) 0.0497(15) 0.0105(13) -0.0015(11) -0.0042(12) 
C8 0.0363(14) 0.068(2) 0.0700(19) 0.0232(15) -0.0129(13) -0.0246(14) 
C9 0.0508(17) 0.0375(14) 0.085(2) 0.0101(14) -0.0182(15) -0.0141(12) 
C10 0.0379(13) 0.0348(13) 0.0612(16) -0.0020(11) -0.0072(11) -0.0036(10) 
C11 0.0287(10) 0.0219(10) 0.0291(10) 0.0014(8) 0.0051(8) -0.0006(8) 
C12 0.0287(10) 0.0258(10) 0.0273(10) -0.0015(8) 0.0007(8) 0.0011(8) 
C13 0.0260(10) 0.0247(10) 0.0233(9) -0.0012(8) -0.0003(8) 0.0028(8) 
C15 0.0321(11) 0.0245(10) 0.0241(10) -0.0001(8) -0.0001(8) 0.0008(8) 
C16 0.0382(12) 0.0393(13) 0.0303(11) 0.0054(9) -0.0056(9) -0.0058(10) 
C17 0.0546(15) 0.0420(13) 0.0269(11) 0.0049(10) -0.0101(10) -0.0097(11) 
C18 0.0558(15) 0.0377(13) 0.0215(10) 0.0019(9) 0.0019(10) 0.0001(11) 
C19 0.0376(12) 0.0379(12) 0.0317(11) 0.0037(9) 0.0045(9) -0.0024(10) 
C20 0.0354(11) 0.0320(11) 0.0232(10) -0.0016(8) -0.0011(8) -0.0004(9) 
C21 0.0275(10) 0.0277(10) 0.0192(9) 0.0023(7) 0.0069(8) 0.0011(8) 
C22 0.0273(10) 0.0256(10) 0.0204(9) -0.0013(7) 0.0048(7) 0.0046(8) 
C23 0.0242(9) 0.0253(10) 0.0196(9) 0.0005(7) 0.0015(7) 0.0041(8) 
C24 0.0309(10) 0.0269(10) 0.0229(10) -0.0026(8) 0.0055(8) -0.0010(9) 
C25 0.0251(10) 0.0247(10) 0.0306(10) 0.0035(8) 0.0049(8) 0.0041(8) 
C26 0.0327(12) 0.0315(12) 0.0389(12) -0.0001(9) 0.0019(9) 0.0006(9) 
C27 0.0436(14) 0.0287(12) 0.0614(16) -0.0034(11) -0.0001(12) -0.0030(10) 
C28 0.0472(15) 0.0296(13) 0.0688(18) 0.0166(12) 0.0062(13) -0.0026(11) 
C29 0.0425(14) 0.0408(14) 0.0476(14) 0.0175(11) 0.0116(11) 0.0030(11) 
C30 0.0348(12) 0.0321(12) 0.0335(11) 0.0066(9) 0.0061(9) 0.0059(9) 
Cu1 0.02606(14) 0.02643(15) 0.02189(14) 0.00473(9) 0.00529(9) -0.00002(10) 
N1 0.0242(8) 0.0263(9) 0.0253(8) 0.0007(7) 0.0001(6) 0.0012(7) 
N2 0.0282(9) 0.0239(8) 0.0206(8) 0.0005(6) 0.0000(6) 0.0048(7) 
N3 0.0322(10) 0.0429(11) 0.0455(11) 0.0111(9) -0.0032(8) 0.0073(9) 
N4 0.0250(8) 0.0256(8) 0.0184(7) 0.0017(6) 0.0026(6) 0.0011(7) 
N5 0.0252(8) 0.0214(8) 0.0205(8) 0.0028(6) 0.0035(6) 0.0017(6) 
N6 0.0573(14) 0.0521(13) 0.0431(12) -0.0078(10) -0.0020(10) -0.0196(11) 
N7 0.0245(8) 0.0203(8) 0.0198(8) 0.0026(6) 0.0036(6) 0.0022(6) 
N8 0.0251(8) 0.0219(8) 0.0178(7) 0.0022(6) 0.0038(6) 0.0020(6) 
N9 0.0343(9) 0.0270(9) 0.0244(8) 0.0006(7) 0.0099(7) -0.0028(8) 
 
_geom_special_details 
; 
 All esds (except the esd in the dihedral angle between two l.s. planes) 
 are estimated using the full covariance matrix.  The cell esds are taken 
 into account individually in the estimation of esds in distances, angles 
 and torsion angles; correlations between esds in cell parameters are only 
 used when they are defined by crystal symmetry.  An approximate (isotropic) 
 treatment of cell esds is used for estimating esds involving l.s. planes. 
; 
 
loop_ 
 _geom_bond_atom_site_label_1 
 _geom_bond_atom_site_label_2 
 _geom_bond_distance 
 _geom_bond_site_symmetry_2 
 _geom_bond_publ_flag 
B1 N5 1.545(3) . ? 
B1 N2 1.550(3) . ? 
B1 N8 1.553(3) . ? 
B1 H1A 0.9800 . ? 
C1 N2 1.341(2) . ? 
C1 C2 1.381(3) . ? 
C1 H1 0.9300 . ? 
C2 C3 1.413(3) . ? 
C2 C4 1.431(3) . ? 
C3 N1 1.327(3) . ? 
C3 C5 1.469(3) . ? 
C4 N3 1.141(3) . ? 
C5 C6 1.383(3) . ? 
C5 C10 1.393(3) . ? 
C6 C7 1.385(4) . ? 
C6 H6 0.9300 . ? 
C7 C8 1.372(4) . ? 
C7 H7 0.9300 . ? 
C8 C9 1.372(5) . ? 
C8 H8 0.9300 . ? 
C9 C10 1.379(4) . ? 
C9 H9 0.9300 . ? 
C10 H10 0.9300 . ? 
C11 N5 1.327(3) . ? 
C11 C12 1.385(3) . ? 
C11 H11 0.9300 . ? 
C12 C13 1.413(3) . ? 
C12 C14 1.428(3) . ? 
C13 N4 1.339(2) . ? 
C13 C15 1.474(3) . ? 
C14 N6 1.141(3) . ? 
C15 C20 1.386(3) . ? 
C15 C16 1.391(3) . ? 
C16 C17 1.386(3) . ? 
C16 H16 0.9300 . ? 
C17 C18 1.365(4) . ? 
C17 H17 0.9300 . ? 
C18 C19 1.384(3) . ? 
C18 H18 0.9300 . ? 
C19 C20 1.384(3) . ? 
C19 H19 0.9300 . ? 
C20 H20 0.9300 . ? 
C21 N8 1.332(2) . ? 
C21 C22 1.383(3) . ? 
C21 H21 0.9300 . ? 
C22 C23 1.415(3) . ? 
C22 C24 1.417(3) 4_665 ? 
C23 N7 1.332(2) . ? 
C23 C25 1.474(3) . ? 
C24 N9 1.141(3) . ? 
C24 C22 1.417(3) 4_566 ? 
C25 C30 1.395(3) . ? 
C25 C26 1.398(3) . ? 
C26 C27 1.384(3) . ? 
C26 H26 0.9300 . ? 
C27 C28 1.382(4) . ? 
C27 H27 0.9300 . ? 
C28 C29 1.378(4) . ? 
C28 H28 0.9300 . ? 
C29 C30 1.384(3) . ? 
C29 H29 0.9300 . ? 
C30 H30 0.9300 . ? 
Cu1 N9 1.8767(16) . ? 
Cu1 N1 2.0641(16) . ? 
Cu1 N7 2.0884(15) . ? 
Cu1 N4 2.1107(16) . ? 
N1 N2 1.368(2) . ? 
N4 N5 1.368(2) . ? 
N7 N8 1.372(2) . ? 
 
loop_ 
 _geom_angle_atom_site_label_1 
 _geom_angle_atom_site_label_2 
 _geom_angle_atom_site_label_3 
 _geom_angle 
 _geom_angle_site_symmetry_1 
 _geom_angle_site_symmetry_3 
 _geom_angle_publ_flag 
N5 B1 N2 109.28(15) . . ? 
N5 B1 N8 107.84(15) . . ? 
N2 B1 N8 109.92(16) . . ? 
N5 B1 H1A 109.9 . . ? 
N2 B1 H1A 109.9 . . ? 
N8 B1 H1A 109.9 . . ? 
N2 C1 C2 107.86(18) . . ? 
N2 C1 H1 126.1 . . ? 
C2 C1 H1 126.1 . . ? 
C1 C2 C3 105.57(17) . . ? 
C1 C2 C4 129.99(19) . . ? 
C3 C2 C4 124.40(19) . . ? 
N1 C3 C2 109.06(18) . . ? 
N1 C3 C5 119.86(18) . . ? 
C2 C3 C5 131.01(18) . . ? 
N3 C4 C2 177.2(2) . . ? 
C6 C5 C10 119.5(2) . . ? 
C6 C5 C3 121.5(2) . . ? 
C10 C5 C3 119.0(2) . . ? 
C5 C6 C7 120.0(2) . . ? 
C5 C6 H6 120.0 . . ? 
C7 C6 H6 120.0 . . ? 
C8 C7 C6 120.0(3) . . ? 
C8 C7 H7 120.0 . . ? 
C6 C7 H7 120.0 . . ? 
C7 C8 C9 120.6(3) . . ? 
C7 C8 H8 119.7 . . ? 
C9 C8 H8 119.7 . . ? 
C8 C9 C10 120.1(3) . . ? 
C8 C9 H9 120.0 . . ? 
C10 C9 H9 120.0 . . ? 
C9 C10 C5 119.9(3) . . ? 
C9 C10 H10 120.1 . . ? 
C5 C10 H10 120.1 . . ? 
N5 C11 C12 108.13(17) . . ? 
N5 C11 H11 125.9 . . ? 
C12 C11 H11 125.9 . . ? 
C11 C12 C13 105.12(17) . . ? 
C11 C12 C14 125.33(19) . . ? 
C13 C12 C14 129.54(19) . . ? 
N4 C13 C12 109.33(17) . . ? 
N4 C13 C15 122.22(18) . . ? 
C12 C13 C15 128.29(18) . . ? 
N6 C14 C12 178.3(3) . . ? 
C20 C15 C16 118.39(19) . . ? 
C20 C15 C13 120.74(18) . . ? 
C16 C15 C13 120.71(19) . . ? 
C17 C16 C15 120.7(2) . . ? 
C17 C16 H16 119.6 . . ? 
C15 C16 H16 119.6 . . ? 
C18 C17 C16 120.1(2) . . ? 
C18 C17 H17 119.9 . . ? 
C16 C17 H17 119.9 . . ? 
C17 C18 C19 120.1(2) . . ? 
C17 C18 H18 119.9 . . ? 
C19 C18 H18 119.9 . . ? 
C20 C19 C18 119.9(2) . . ? 
C20 C19 H19 120.0 . . ? 
C18 C19 H19 120.0 . . ? 
C19 C20 C15 120.70(19) . . ? 
C19 C20 H20 119.7 . . ? 
C15 C20 H20 119.7 . . ? 
N8 C21 C22 108.13(17) . . ? 
N8 C21 H21 125.9 . . ? 
C22 C21 H21 125.9 . . ? 
C21 C22 C23 105.39(16) . . ? 
C21 C22 C24 127.37(18) . 4_665 ? 
C23 C22 C24 127.23(18) . 4_665 ? 
N7 C23 C22 109.07(17) . . ? 
N7 C23 C25 122.38(17) . . ? 
C22 C23 C25 128.49(17) . . ? 
N9 C24 C22 178.0(2) . 4_566 ? 
C30 C25 C26 118.9(2) . . ? 
C30 C25 C23 120.83(19) . . ? 
C26 C25 C23 120.22(18) . . ? 
C27 C26 C25 120.5(2) . . ? 
C27 C26 H26 119.8 . . ? 
C25 C26 H26 119.8 . . ? 
C28 C27 C26 119.8(2) . . ? 
C28 C27 H27 120.1 . . ? 
C26 C27 H27 120.1 . . ? 
C29 C28 C27 120.4(2) . . ? 
C29 C28 H28 119.8 . . ? 
C27 C28 H28 119.8 . . ? 
C28 C29 C30 120.3(2) . . ? 
C28 C29 H29 119.9 . . ? 
C30 C29 H29 119.9 . . ? 
C29 C30 C25 120.2(2) . . ? 
C29 C30 H30 119.9 . . ? 
C25 C30 H30 119.9 . . ? 
N9 Cu1 N1 121.04(7) . . ? 
N9 Cu1 N7 125.96(7) . . ? 
N1 Cu1 N7 86.29(6) . . ? 
N9 Cu1 N4 126.17(7) . . ? 
N1 Cu1 N4 90.87(6) . . ? 
N7 Cu1 N4 95.39(6) . . ? 
C3 N1 N2 107.55(16) . . ? 
C3 N1 Cu1 135.41(14) . . ? 
N2 N1 Cu1 114.66(11) . . ? 
C1 N2 N1 109.95(16) . . ? 
C1 N2 B1 130.69(17) . . ? 
N1 N2 B1 119.26(15) . . ? 
C13 N4 N5 106.50(15) . . ? 
C13 N4 Cu1 139.41(13) . . ? 
N5 N4 Cu1 112.13(11) . . ? 
C11 N5 N4 110.86(15) . . ? 
C11 N5 B1 127.85(16) . . ? 
N4 N5 B1 121.24(15) . . ? 
C23 N7 N8 107.12(15) . . ? 
C23 N7 Cu1 139.96(13) . . ? 
N8 N7 Cu1 112.76(11) . . ? 
C21 N8 N7 110.24(15) . . ? 
C21 N8 B1 128.56(16) . . ? 
N7 N8 B1 121.19(15) . . ? 
C24 N9 Cu1 169.66(17) . . ? 
 
_diffrn_measured_fraction_theta_max    0.998 
_diffrn_reflns_theta_full              26.00 
_diffrn_measured_fraction_theta_full   0.998 
_refine_diff_density_max    0.461 
_refine_diff_density_min   -0.343 
_refine_diff_density_rms    0.055 
#===END
#------------------  SECTION 2. COMPOUND(S) DETAILS -------------------------#
 
data_pz0038_1_0m
_audit_creation_method            SHELXL-97
_chemical_name_systematic
;
 ?
;
_chemical_name_common             ?
_chemical_melting_point           ?
_chemical_formula_moiety          ?
_chemical_formula_sum
 'C24 H31 B Cu N9'
_chemical_formula_weight          519.93
loop_
 _atom_type_symbol
 _atom_type_description
 _atom_type_scat_dispersion_real
 _atom_type_scat_dispersion_imag
 _atom_type_scat_source
 'C'  'C'   0.0033   0.0016
 'International Tables Vol C Tables 4.2.6.8 and 6.1.1.4'
 'H'  'H'   0.0000   0.0000
 'International Tables Vol C Tables 4.2.6.8 and 6.1.1.4'
 'B'  'B'   0.0013   0.0007
 'International Tables Vol C Tables 4.2.6.8 and 6.1.1.4'
 'N'  'N'   0.0061   0.0033
 'International Tables Vol C Tables 4.2.6.8 and 6.1.1.4'
 'Cu'  'Cu'   0.3201   1.2651
 'International Tables Vol C Tables 4.2.6.8 and 6.1.1.4'
_symmetry_cell_setting            Monoclinic
_symmetry_space_group_name_H-M    C2/c
loop_
 _symmetry_equiv_pos_as_xyz
 'x, y, z'
 '-x, y, -z+1/2'
 'x+1/2, y+1/2, z'
 '-x+1/2, y+1/2, -z+1/2'
 '-x, -y, -z'
 'x, -y, z-1/2'
 '-x+1/2, -y+1/2, -z'
 'x+1/2, -y+1/2, z-1/2'
_cell_length_a                    26.8861(10)
_cell_length_b                    14.6844(5)
_cell_length_c                    17.1846(6)
_cell_angle_alpha                 90.00
_cell_angle_beta                  117.672(2)
_cell_angle_gamma                 90.00
_cell_volume                      6008.6(4)
_cell_formula_units_Z             8
_cell_measurement_temperature     296(2)
_cell_measurement_reflns_used     9996
_cell_measurement_theta_min       2.92
_cell_measurement_theta_max       21.35
_exptl_crystal_description        block
_exptl_crystal_colour             yellow
_exptl_crystal_size_max           0.32
_exptl_crystal_size_mid           0.12
_exptl_crystal_size_min           0.12
_exptl_crystal_density_meas       'not measured'
_exptl_crystal_density_diffrn     1.150
_exptl_crystal_F_000              2176
_exptl_absorpt_coefficient_mu     0.753
_exptl_absorpt_correction_type    none
_exptl_absorpt_correction_T_min   0.7945
_exptl_absorpt_correction_T_max   0.9150
_exptl_absorpt_process_details    ?
_exptl_special_details
;
 ?
;
_diffrn_ambient_temperature       296(2)
_diffrn_radiation_wavelength      0.71073
_diffrn_radiation_type            MoK\a
_diffrn_radiation_source          'fine-focus sealed tube'
_diffrn_radiation_monochromator   graphite
_diffrn_measurement_device_type   'Bruker Kappa APEX2'
_diffrn_measurement_method        'phi and omega scans'
_diffrn_detector_area_resol_mean  ?
_diffrn_standards_number          ?
_diffrn_standards_interval_count  ?
_diffrn_standards_interval_time   ?
_diffrn_standards_decay_%         ?
_diffrn_reflns_number             56568
_diffrn_reflns_av_R_equivalents   0.0540
_diffrn_reflns_av_sigmaI/netI     0.0255
_diffrn_reflns_limit_h_min        -27
_diffrn_reflns_limit_h_max        27
_diffrn_reflns_limit_k_min        -15
_diffrn_reflns_limit_k_max        15
_diffrn_reflns_limit_l_min        -17
_diffrn_reflns_limit_l_max        17
_diffrn_reflns_theta_min          3.05
_diffrn_reflns_theta_max          21.58
_reflns_number_total              3480
_reflns_number_gt                 2825
_reflns_threshold_expression      >2sigma(I)
_computing_data_collection        'Bruker APEX2'
_computing_cell_refinement        'Bruker APEX2'
_computing_data_reduction         'Bruker SAINT'
_computing_structure_solution     'SHELXS-97 (Sheldrick, 1990)'
_computing_structure_refinement   'SHELXL-97 (Sheldrick, 1997)'
_computing_molecular_graphics     'Bruker SHELXTL'
_computing_publication_material   'Bruker SHELXTL'
_refine_special_details
;
 Refinement of F^2^ against ALL reflections.  The weighted R-factor wR and
 goodness of fit S are based on F^2^, conventional R-factors R are based
 on F, with F set to zero for negative F^2^. The threshold expression of
 F^2^ > 2sigma(F^2^) is used only for calculating R-factors(gt) etc. and is
 not relevant to the choice of reflections for refinement.  R-factors based
 on F^2^ are statistically about twice as large as those based on F, and R-
 factors based on ALL data will be even larger.
;
_refine_ls_structure_factor_coef  Fsqd
_refine_ls_matrix_type            full
_refine_ls_weighting_scheme       calc
_refine_ls_weighting_details
 'calc w=1/[\s^2^(Fo^2^)+(0.0402P)^2^+10.5289P] where P=(Fo^2^+2Fc^2^)/3'
_atom_sites_solution_primary      direct
_atom_sites_solution_secondary    difmap
_atom_sites_solution_hydrogens    geom
_refine_ls_hydrogen_treatment     noref
_refine_ls_extinction_method      none
_refine_ls_extinction_coef        ?
_refine_ls_number_reflns          3480
_refine_ls_number_parameters      325
_refine_ls_number_restraints      0
_refine_ls_R_factor_all           0.0478
_refine_ls_R_factor_gt            0.0338
_refine_ls_wR_factor_ref          0.0917
_refine_ls_wR_factor_gt           0.0833
_refine_ls_goodness_of_fit_ref    1.062
_refine_ls_restrained_S_all       1.062
_refine_ls_shift/su_max           0.001
_refine_ls_shift/su_mean          0.000
loop_
 _atom_site_label
 _atom_site_type_symbol
 _atom_site_fract_x
 _atom_site_fract_y
 _atom_site_fract_z
 _atom_site_U_iso_or_equiv
 _atom_site_adp_type
 _atom_site_occupancy
 _atom_site_symmetry_multiplicity
 _atom_site_calc_flag
 _atom_site_refinement_flags
 _atom_site_disorder_assembly
 _atom_site_disorder_group
B1 B 0.09165(16) 0.9228(3) 0.1413(2) 0.0400(10) Uani 1 1 d . . .
H1A H 0.0718 0.9812 0.1258 0.048 Uiso 1 1 calc R . .
C1 C 0.02632(14) 0.8789(2) -0.0189(2) 0.0459(9) Uani 1 1 d . . .
H1 H 0.0071 0.9339 -0.0363 0.055 Uiso 1 1 calc R . .
C2 C 0.01680(13) 0.8038(2) -0.0715(2) 0.0417(9) Uani 1 1 d . . .
C3 C 0.05596(13) 0.7385(2) -0.0178(2) 0.0335(8) Uani 1 1 d . . .
C4 C -0.02623(16) 0.8011(2) -0.1603(3) 0.0547(10) Uani 1 1 d . . .
C5 C 0.06675(14) 0.6427(2) -0.0371(2) 0.0440(9) Uani 1 1 d . . .
C6 C 0.02440(19) 0.6142(3) -0.1290(3) 0.0880(16) Uani 1 1 d . . .
H6A H -0.0127 0.6170 -0.1343 0.132 Uiso 1 1 calc R . .
H6B H 0.0323 0.5531 -0.1398 0.132 Uiso 1 1 calc R . .
H6C H 0.0268 0.6546 -0.1710 0.132 Uiso 1 1 calc R . .
C7 C 0.12592(17) 0.6371(3) -0.0269(3) 0.0709(12) Uani 1 1 d . . .
H7A H 0.1287 0.6752 -0.0701 0.106 Uiso 1 1 calc R . .
H7B H 0.1342 0.5753 -0.0350 0.106 Uiso 1 1 calc R . .
H7C H 0.1523 0.6574 0.0308 0.106 Uiso 1 1 calc R . .
C8 C 0.06217(18) 0.5782(2) 0.0292(3) 0.0679(12) Uani 1 1 d . . .
H8A H 0.0891 0.5954 0.0876 0.102 Uiso 1 1 calc R . .
H8B H 0.0695 0.5169 0.0179 0.102 Uiso 1 1 calc R . .
H8C H 0.0250 0.5817 0.0237 0.102 Uiso 1 1 calc R . .
C9 C 0.07387(14) 0.9231(3) 0.2755(2) 0.0525(10) Uani 1 1 d . . .
H9 H 0.0628 0.9837 0.2721 0.063 Uiso 1 1 calc R . .
C10 C 0.08057(15) 0.8629(3) 0.3408(2) 0.0538(10) Uani 1 1 d . . .
C11 C 0.09716(13) 0.7800(3) 0.3183(2) 0.0441(9) Uani 1 1 d . . .
C12 C 0.07605(18) 0.8865(3) 0.4180(3) 0.0787(14) Uani 1 1 d . . .
C13 C 0.11000(16) 0.6893(3) 0.3642(2) 0.0586(11) Uani 1 1 d . . .
C14 C 0.17374(17) 0.6815(3) 0.4223(3) 0.0821(14) Uani 1 1 d . . .
H14A H 0.1924 0.6883 0.3867 0.123 Uiso 1 1 calc R . .
H14B H 0.1825 0.6230 0.4504 0.123 Uiso 1 1 calc R . .
H14C H 0.1861 0.7284 0.4663 0.123 Uiso 1 1 calc R . .
C15 C 0.0800(2) 0.6796(3) 0.4212(3) 0.0918(16) Uani 1 1 d . . .
H15A H 0.0941 0.7247 0.4669 0.138 Uiso 1 1 calc R . .
H15B H 0.0869 0.6200 0.4470 0.138 Uiso 1 1 calc R . .
H15C H 0.0404 0.6882 0.3854 0.138 Uiso 1 1 calc R . .
C16 C 0.08964(17) 0.6125(3) 0.2964(3) 0.0653(11) Uani 1 1 d . . .
H16A H 0.0499 0.6181 0.2597 0.098 Uiso 1 1 calc R . .
H16B H 0.0978 0.5548 0.3261 0.098 Uiso 1 1 calc R . .
H16C H 0.1085 0.6164 0.2609 0.098 Uiso 1 1 calc R . .
C17 C 0.18069(14) 1.0183(2) 0.1878(2) 0.0399(9) Uani 1 1 d . . .
H17 H 0.1640 1.0754 0.1787 0.048 Uiso 1 1 calc R . .
C18 C 0.23733(13) 1.0017(2) 0.2203(2) 0.0363(8) Uani 1 1 d . . .
C19 C 0.24258(13) 0.9057(2) 0.2212(2) 0.0349(8) Uani 1 1 d . . .
C20 C 0.27771(14) 1.0725(2) 0.2499(2) 0.0389(8) Uani 1 1 d . . .
C21 C 0.29411(13) 0.8470(2) 0.2468(2) 0.0450(9) Uani 1 1 d . . .
C22 C 0.34437(16) 0.9052(3) 0.2585(4) 0.0872(16) Uani 1 1 d . . .
H22A H 0.3340 0.9424 0.2073 0.131 Uiso 1 1 calc R . .
H22B H 0.3750 0.8662 0.2664 0.131 Uiso 1 1 calc R . .
H22C H 0.3556 0.9435 0.3092 0.131 Uiso 1 1 calc R . .
C23 C 0.30670(17) 0.7968(3) 0.3311(2) 0.0671(12) Uani 1 1 d . . .
H23A H 0.3164 0.8399 0.3780 0.101 Uiso 1 1 calc R . .
H23B H 0.3375 0.7557 0.3455 0.101 Uiso 1 1 calc R . .
H23C H 0.2741 0.7630 0.3233 0.101 Uiso 1 1 calc R . .
C24 C 0.28291(16) 0.7783(2) 0.1737(3) 0.0565(10) Uani 1 1 d . . .
H24A H 0.2511 0.7414 0.1641 0.085 Uiso 1 1 calc R . .
H24B H 0.3153 0.7401 0.1905 0.085 Uiso 1 1 calc R . .
H24C H 0.2754 0.8102 0.1206 0.085 Uiso 1 1 calc R . .
Cu1 Cu 0.149826(16) 0.74112(2) 0.18350(2) 0.03626(17) Uani 1 1 d . . .
N1 N 0.08609(10) 0.77357(16) 0.06257(16) 0.0327(6) Uani 1 1 d . . .
N2 N 0.06725(11) 0.86039(17) 0.06070(16) 0.0360(7) Uani 1 1 d . . .
N3 N -0.06231(16) 0.8034(3) -0.2309(2) 0.0791(11) Uani 1 1 d . . .
N4 N 0.10174(11) 0.79257(18) 0.24494(17) 0.0408(7) Uani 1 1 d . . .
N5 N 0.08581(10) 0.88049(18) 0.21810(17) 0.0391(7) Uani 1 1 d . . .
N6 N 0.07420(19) 0.9081(4) 0.4805(3) 0.1157(17) Uani 1 1 d . . .
N7 N 0.19203(11) 0.86864(16) 0.19336(16) 0.0339(7) Uani 1 1 d . . .
N8 N 0.15412(10) 0.93941(16) 0.17167(16) 0.0350(7) Uani 1 1 d . . .
N9 N 0.19299(12) 0.63452(19) 0.22558(18) 0.0401(7) Uani 1 1 d . . .
loop_
 _atom_site_aniso_label
 _atom_site_aniso_U_11
 _atom_site_aniso_U_22
 _atom_site_aniso_U_33
 _atom_site_aniso_U_23
 _atom_site_aniso_U_13
 _atom_site_aniso_U_12
B1 0.043(3) 0.024(2) 0.042(2) -0.0036(18) 0.010(2) 0.0082(18)
C1 0.044(2) 0.037(2) 0.041(2) -0.0009(18) 0.0062(19) 0.0157(17)
C2 0.039(2) 0.040(2) 0.032(2) -0.0051(17) 0.0049(17) 0.0079(17)
C3 0.0321(18) 0.0320(19) 0.0327(19) -0.0056(16) 0.0119(16) 0.0013(16)
C4 0.056(3) 0.045(2) 0.047(3) -0.0054(19) 0.011(2) 0.0112(19)
C5 0.047(2) 0.037(2) 0.039(2) -0.0085(17) 0.0123(17) 0.0033(17)
C6 0.098(3) 0.059(3) 0.056(3) -0.032(2) -0.006(2) 0.024(3)
C7 0.079(3) 0.058(3) 0.083(3) -0.016(2) 0.044(3) 0.013(2)
C8 0.087(3) 0.033(2) 0.073(3) -0.012(2) 0.028(2) -0.009(2)
C9 0.043(2) 0.061(3) 0.048(2) -0.013(2) 0.0168(19) 0.0144(19)
C10 0.045(2) 0.077(3) 0.040(2) -0.009(2) 0.0206(19) 0.011(2)
C11 0.034(2) 0.060(3) 0.034(2) -0.0046(19) 0.0117(16) -0.0080(18)
C12 0.065(3) 0.110(4) 0.068(3) -0.005(3) 0.037(3) 0.020(3)
C13 0.063(3) 0.067(3) 0.046(2) 0.005(2) 0.026(2) -0.012(2)
C14 0.078(3) 0.082(3) 0.060(3) 0.029(2) 0.010(2) 0.005(3)
C15 0.122(4) 0.103(4) 0.069(3) -0.002(3) 0.060(3) -0.029(3)
C16 0.078(3) 0.059(3) 0.066(3) 0.007(2) 0.039(2) -0.008(2)
C17 0.051(2) 0.021(2) 0.037(2) -0.0029(15) 0.0110(17) 0.0031(17)
C18 0.040(2) 0.0205(19) 0.0372(19) -0.0028(15) 0.0088(16) -0.0041(16)
C19 0.039(2) 0.0241(19) 0.0349(19) -0.0003(15) 0.0116(16) -0.0007(16)
C20 0.045(2) 0.027(2) 0.037(2) 0.0007(17) 0.0125(17) 0.0063(19)
C21 0.036(2) 0.0263(19) 0.060(2) -0.0054(18) 0.0115(18) -0.0027(16)
C22 0.049(3) 0.039(2) 0.161(5) -0.012(3) 0.038(3) -0.002(2)
C23 0.062(3) 0.049(2) 0.056(3) -0.005(2) -0.002(2) 0.016(2)
C24 0.054(2) 0.041(2) 0.078(3) -0.004(2) 0.034(2) 0.0031(18)
Cu1 0.0422(3) 0.0235(3) 0.0352(3) 0.00123(18) 0.0113(2) 0.00505(18)
N1 0.0383(15) 0.0236(15) 0.0333(17) -0.0035(12) 0.0143(13) 0.0052(12)
N2 0.0362(16) 0.0268(16) 0.0349(17) -0.0027(12) 0.0080(14) 0.0099(12)
N3 0.073(2) 0.081(3) 0.045(2) -0.0052(19) -0.005(2) 0.016(2)
N4 0.0454(17) 0.0376(18) 0.0354(17) -0.0030(14) 0.0153(14) -0.0007(14)
N5 0.0366(16) 0.0371(18) 0.0372(16) -0.0073(14) 0.0118(14) 0.0055(13)
N6 0.129(4) 0.164(5) 0.086(3) -0.016(3) 0.078(3) 0.028(3)
N7 0.0363(17) 0.0197(14) 0.0381(16) -0.0004(12) 0.0107(13) 0.0040(13)
N8 0.0402(17) 0.0172(15) 0.0369(16) -0.0016(12) 0.0088(13) 0.0028(14)
N9 0.0436(17) 0.0221(16) 0.0460(18) 0.0023(14) 0.0135(14) -0.0005(14)
_geom_special_details
;
 All esds (except the esd in the dihedral angle between two l.s. planes)
 are estimated using the full covariance matrix.  The cell esds are taken
 into account individually in the estimation of esds in distances, angles
 and torsion angles; correlations between esds in cell parameters are only
 used when they are defined by crystal symmetry.  An approximate (isotropic)
 treatment of cell esds is used for estimating esds involving l.s. planes.
;
loop_
 _geom_bond_atom_site_label_1
 _geom_bond_atom_site_label_2
 _geom_bond_distance
 _geom_bond_site_symmetry_2
 _geom_bond_publ_flag
B1 N8 1.529(5) . ?
B1 N2 1.531(4) . ?
B1 N5 1.532(5) . ?
B1 H1A 0.9800 . ?
C1 N2 1.326(4) . ?
C1 C2 1.373(4) . ?
C1 H1 0.9300 . ?
C2 C3 1.407(4) . ?
C2 C4 1.425(5) . ?
C3 N1 1.338(4) . ?
C3 C5 1.504(4) . ?
C4 N3 1.149(4) . ?
C5 C6 1.514(5) . ?
C5 C7 1.519(5) . ?
C5 C8 1.530(5) . ?
C6 H6A 0.9600 . ?
C6 H6B 0.9600 . ?
C6 H6C 0.9600 . ?
C7 H7A 0.9600 . ?
C7 H7B 0.9600 . ?
C7 H7C 0.9600 . ?
C8 H8A 0.9600 . ?
C8 H8B 0.9600 . ?
C8 H8C 0.9600 . ?
C9 N5 1.328(4) . ?
C9 C10 1.372(5) . ?
C9 H9 0.9300 . ?
C10 C11 1.410(5) . ?
C10 C12 1.431(6) . ?
C11 N4 1.336(4) . ?
C11 C13 1.504(5) . ?
C12 N6 1.143(5) . ?
C13 C16 1.528(5) . ?
C13 C14 1.536(5) . ?
C13 C15 1.537(5) . ?
C14 H14A 0.9600 . ?
C14 H14B 0.9600 . ?
C14 H14C 0.9600 . ?
C15 H15A 0.9600 . ?
C15 H15B 0.9600 . ?
C15 H15C 0.9600 . ?
C16 H16A 0.9600 . ?
C16 H16B 0.9600 . ?
C16 H16C 0.9600 . ?
C17 N8 1.320(4) . ?
C17 C18 1.378(4) . ?
C17 H17 0.9300 . ?
C18 C19 1.416(4) . ?
C18 C20 1.416(5) . ?
C19 N7 1.330(4) . ?
C19 C21 1.513(4) . ?
C20 N9 1.149(4) 4 ?
C21 C23 1.518(5) . ?
C21 C24 1.529(5) . ?
C21 C22 1.531(5) . ?
C22 H22A 0.9600 . ?
C22 H22B 0.9600 . ?
C22 H22C 0.9600 . ?
C23 H23A 0.9600 . ?
C23 H23B 0.9600 . ?
C23 H23C 0.9600 . ?
C24 H24A 0.9600 . ?
C24 H24B 0.9600 . ?
C24 H24C 0.9600 . ?
Cu1 N9 1.882(3) . ?
Cu1 N1 2.043(2) . ?
Cu1 N4 2.151(3) . ?
Cu1 N7 2.155(3) . ?
N1 N2 1.367(3) . ?
N4 N5 1.371(4) . ?
N7 N8 1.380(3) . ?
N9 C20 1.149(4) 4_545 ?
loop_
 _geom_angle_atom_site_label_1
 _geom_angle_atom_site_label_2
 _geom_angle_atom_site_label_3
 _geom_angle
 _geom_angle_site_symmetry_1
 _geom_angle_site_symmetry_3
 _geom_angle_publ_flag
N8 B1 N2 110.2(3) . . ?
N8 B1 N5 107.8(3) . . ?
N2 B1 N5 111.3(3) . . ?
N8 B1 H1A 109.1 . . ?
N2 B1 H1A 109.1 . . ?
N5 B1 H1A 109.1 . . ?
N2 C1 C2 109.1(3) . . ?
N2 C1 H1 125.5 . . ?
C2 C1 H1 125.5 . . ?
C1 C2 C3 105.2(3) . . ?
C1 C2 C4 122.6(3) . . ?
C3 C2 C4 132.2(3) . . ?
N1 C3 C2 108.9(3) . . ?
N1 C3 C5 120.1(3) . . ?
C2 C3 C5 130.9(3) . . ?
N3 C4 C2 176.0(4) . . ?
C3 C5 C6 111.1(3) . . ?
C3 C5 C7 108.9(3) . . ?
C6 C5 C7 110.2(3) . . ?
C3 C5 C8 108.9(3) . . ?
C6 C5 C8 108.9(3) . . ?
C7 C5 C8 108.8(3) . . ?
C5 C6 H6A 109.5 . . ?
C5 C6 H6B 109.5 . . ?
H6A C6 H6B 109.5 . . ?
C5 C6 H6C 109.5 . . ?
H6A C6 H6C 109.5 . . ?
H6B C6 H6C 109.5 . . ?
C5 C7 H7A 109.5 . . ?
C5 C7 H7B 109.5 . . ?
H7A C7 H7B 109.5 . . ?
C5 C7 H7C 109.5 . . ?
H7A C7 H7C 109.5 . . ?
H7B C7 H7C 109.5 . . ?
C5 C8 H8A 109.5 . . ?
C5 C8 H8B 109.5 . . ?
H8A C8 H8B 109.5 . . ?
C5 C8 H8C 109.5 . . ?
H8A C8 H8C 109.5 . . ?
H8B C8 H8C 109.5 . . ?
N5 C9 C10 108.5(3) . . ?
N5 C9 H9 125.7 . . ?
C10 C9 H9 125.7 . . ?
C9 C10 C11 105.8(3) . . ?
C9 C10 C12 124.5(4) . . ?
C11 C10 C12 129.5(4) . . ?
N4 C11 C10 108.6(3) . . ?
N4 C11 C13 121.2(3) . . ?
C10 C11 C13 130.3(3) . . ?
N6 C12 C10 177.1(6) . . ?
C11 C13 C16 109.9(3) . . ?
C11 C13 C14 108.8(3) . . ?
C16 C13 C14 109.7(4) . . ?
C11 C13 C15 110.8(3) . . ?
C16 C13 C15 108.1(3) . . ?
C14 C13 C15 109.6(3) . . ?
C13 C14 H14A 109.5 . . ?
C13 C14 H14B 109.5 . . ?
H14A C14 H14B 109.5 . . ?
C13 C14 H14C 109.5 . . ?
H14A C14 H14C 109.5 . . ?
H14B C14 H14C 109.5 . . ?
C13 C15 H15A 109.5 . . ?
C13 C15 H15B 109.5 . . ?
H15A C15 H15B 109.5 . . ?
C13 C15 H15C 109.5 . . ?
H15A C15 H15C 109.5 . . ?
H15B C15 H15C 109.5 . . ?
C13 C16 H16A 109.5 . . ?
C13 C16 H16B 109.5 . . ?
H16A C16 H16B 109.5 . . ?
C13 C16 H16C 109.5 . . ?
H16A C16 H16C 109.5 . . ?
H16B C16 H16C 109.5 . . ?
N8 C17 C18 108.6(3) . . ?
N8 C17 H17 125.7 . . ?
C18 C17 H17 125.7 . . ?
C17 C18 C19 105.4(3) . . ?
C17 C18 C20 122.3(3) . . ?
C19 C18 C20 132.1(3) . . ?
N7 C19 C18 108.9(3) . . ?
N7 C19 C21 121.1(3) . . ?
C18 C19 C21 130.0(3) . . ?
N9 C20 C18 174.1(3) 4 . ?
C19 C21 C23 108.8(3) . . ?
C19 C21 C24 109.4(3) . . ?
C23 C21 C24 109.6(3) . . ?
C19 C21 C22 110.7(3) . . ?
C23 C21 C22 110.7(3) . . ?
C24 C21 C22 107.5(3) . . ?
C21 C22 H22A 109.5 . . ?
C21 C22 H22B 109.5 . . ?
H22A C22 H22B 109.5 . . ?
C21 C22 H22C 109.5 . . ?
H22A C22 H22C 109.5 . . ?
H22B C22 H22C 109.5 . . ?
C21 C23 H23A 109.5 . . ?
C21 C23 H23B 109.5 . . ?
H23A C23 H23B 109.5 . . ?
C21 C23 H23C 109.5 . . ?
H23A C23 H23C 109.5 . . ?
H23B C23 H23C 109.5 . . ?
C21 C24 H24A 109.5 . . ?
C21 C24 H24B 109.5 . . ?
H24A C24 H24B 109.5 . . ?
C21 C24 H24C 109.5 . . ?
H24A C24 H24C 109.5 . . ?
H24B C24 H24C 109.5 . . ?
N9 Cu1 N1 131.39(11) . . ?
N9 Cu1 N4 120.51(11) . . ?
N1 Cu1 N4 90.34(10) . . ?
N9 Cu1 N7 118.97(11) . . ?
N1 Cu1 N7 92.27(10) . . ?
N4 Cu1 N7 94.06(10) . . ?
C3 N1 N2 107.2(2) . . ?
C3 N1 Cu1 141.2(2) . . ?
N2 N1 Cu1 111.60(18) . . ?
C1 N2 N1 109.7(2) . . ?
C1 N2 B1 127.7(3) . . ?
N1 N2 B1 122.6(2) . . ?
C11 N4 N5 107.2(3) . . ?
C11 N4 Cu1 139.0(2) . . ?
N5 N4 Cu1 109.31(19) . . ?
C9 N5 N4 109.9(3) . . ?
C9 N5 B1 127.3(3) . . ?
N4 N5 B1 122.1(3) . . ?
C19 N7 N8 107.0(2) . . ?
C19 N7 Cu1 142.8(2) . . ?
N8 N7 Cu1 109.70(18) . . ?
C17 N8 N7 110.1(2) . . ?
C17 N8 B1 127.8(3) . . ?
N7 N8 B1 121.9(2) . . ?
C20 N9 Cu1 175.0(3) 4_545 . ?
_diffrn_measured_fraction_theta_max    0.995
_diffrn_reflns_theta_full              21.58
_diffrn_measured_fraction_theta_full   0.995
_refine_diff_density_max    0.319
_refine_diff_density_min   -0.202
_refine_diff_density_rms    0.045
#===END
data_jb0038_0m

 

_audit_creation_method            SHELXL-97

_chemical_name_systematic

;

 ?

;

_chemical_name_common             ?

_chemical_melting_point           ?

_chemical_formula_moiety          ?

_chemical_formula_sum

 'C26 H34 B Cu N10'

_chemical_formula_weight          560.98

 

loop_

 _atom_type_symbol

 _atom_type_description

 _atom_type_scat_dispersion_real

 _atom_type_scat_dispersion_imag

 _atom_type_scat_source

 'C'  'C'   0.0033   0.0016

 'International Tables Vol C Tables 4.2.6.8 and 6.1.1.4'

 'H'  'H'   0.0000   0.0000

 'International Tables Vol C Tables 4.2.6.8 and 6.1.1.4'

 'N'  'N'   0.0061   0.0033

 'International Tables Vol C Tables 4.2.6.8 and 6.1.1.4'

 'B'  'B'   0.0013   0.0007

 'International Tables Vol C Tables 4.2.6.8 and 6.1.1.4'

 'Cu'  'Cu'   0.3201   1.2651

 'International Tables Vol C Tables 4.2.6.8 and 6.1.1.4'

 

_symmetry_cell_setting            Monoclinic

_symmetry_space_group_name_H-M    C2/c

 

loop_

 _symmetry_equiv_pos_as_xyz

 'x, y, z'

 '-x, y, -z+1/2'

 'x+1/2, y+1/2, z'

 '-x+1/2, y+1/2, -z+1/2'

 '-x, -y, -z'

 'x, -y, z-1/2'

 '-x+1/2, -y+1/2, -z'

 'x+1/2, -y+1/2, z-1/2'

 

_cell_length_a                    27.0860(13)

_cell_length_b                    14.6756(8)

_cell_length_c                    17.0389(9)

_cell_angle_alpha                 90.00

_cell_angle_beta                  117.585(2)

_cell_angle_gamma                 90.00

_cell_volume                      6003.1(5)

_cell_formula_units_Z             8

_cell_measurement_temperature     150

_cell_measurement_reflns_used     5439

_cell_measurement_theta_min       2.78

_cell_measurement_theta_max       23.72

 

_exptl_crystal_description        block

_exptl_crystal_colour             colourless

_exptl_crystal_size_max           0.37

_exptl_crystal_size_mid           0.14

_exptl_crystal_size_min           0.12

_exptl_crystal_density_meas       ?

_exptl_crystal_density_diffrn     1.241

_exptl_crystal_density_method     'not measured'

_exptl_crystal_F_000              2352

_exptl_absorpt_coefficient_mu     0.760

_exptl_absorpt_correction_type    numerical

_exptl_absorpt_correction_T_min   0.7652

_exptl_absorpt_correction_T_max   0.9143

_exptl_absorpt_process_details    ?

 

_exptl_special_details

;

 ?

;

 

_diffrn_ambient_temperature       296(2)

_diffrn_radiation_wavelength      0.71073

_diffrn_radiation_type            MoK\a

_diffrn_radiation_source          'fine-focus sealed tube'

_diffrn_radiation_monochromator   graphite

_diffrn_measurement_device_type   'CCD area detector'

_diffrn_measurement_method        'phi and omega scans'

_diffrn_detector_area_resol_mean  ?

_diffrn_standards_number          ?

_diffrn_standards_interval_count  ?

_diffrn_standards_interval_time   ?

_diffrn_standards_decay_%         ?

_diffrn_reflns_number             40245

_diffrn_reflns_av_R_equivalents   0.0679

_diffrn_reflns_av_sigmaI/netI     0.0450

_diffrn_reflns_limit_h_min        -33

_diffrn_reflns_limit_h_max        33

_diffrn_reflns_limit_k_min        -18

_diffrn_reflns_limit_k_max        18

_diffrn_reflns_limit_l_min        -21

_diffrn_reflns_limit_l_max        21

_diffrn_reflns_theta_min          2.90

_diffrn_reflns_theta_max          26.00

_reflns_number_total              5872

_reflns_number_gt                 4451

_reflns_threshold_expression      >2sigma(I)

 

_computing_data_collection        'Bruker SMART'

_computing_cell_refinement        'Bruker SMART'

_computing_data_reduction         'Bruker SAINT'

_computing_structure_solution     'SHELXS-97 (Sheldrick, 1990)'

_computing_structure_refinement   'SHELXL-97 (Sheldrick, 1997)'

_computing_molecular_graphics     'Bruker SHELXTL'

_computing_publication_material   'Bruker SHELXTL'

 

_refine_special_details

;

 Refinement of F^2^ against ALL reflections.  The weighted R-factor wR and

 goodness of fit S are based on F^2^, conventional R-factors R are based

 on F, with F set to zero for negative F^2^. The threshold expression of

 F^2^ > 2sigma(F^2^) is used only for calculating R-factors(gt) etc. and is

 not relevant to the choice of reflections for refinement.  R-factors based

 on F^2^ are statistically about twice as large as those based on F, and R-

 factors based on ALL data will be even larger.

;

 

_refine_ls_structure_factor_coef  Fsqd

_refine_ls_matrix_type            full

_refine_ls_weighting_scheme       calc

_refine_ls_weighting_details

 'calc w=1/[\s^2^(Fo^2^)+(0.0292P)^2^+11.8740P] where P=(Fo^2^+2Fc^2^)/3'

_atom_sites_solution_primary      direct

_atom_sites_solution_secondary    difmap

_atom_sites_solution_hydrogens    geom

_refine_ls_hydrogen_treatment     noref

_refine_ls_extinction_method      none

_refine_ls_extinction_coef        ?

_refine_ls_number_reflns          5872

_refine_ls_number_parameters      353

_refine_ls_number_restraints      12

_refine_ls_R_factor_all           0.0621

_refine_ls_R_factor_gt            0.0395

_refine_ls_wR_factor_ref          0.0937

_refine_ls_wR_factor_gt           0.0844

_refine_ls_goodness_of_fit_ref    1.038

_refine_ls_restrained_S_all       1.037

_refine_ls_shift/su_max           0.001

_refine_ls_shift/su_mean          0.000

 

loop_

 _atom_site_label

 _atom_site_type_symbol

 _atom_site_fract_x

 _atom_site_fract_y

 _atom_site_fract_z

 _atom_site_U_iso_or_equiv

 _atom_site_adp_type

 _atom_site_occupancy

 _atom_site_symmetry_multiplicity

 _atom_site_calc_flag

 _atom_site_refinement_flags

 _atom_site_disorder_assembly

 _atom_site_disorder_group

B1 B 0.40774(11) 0.42371(18) 0.36324(18) 0.0202(6) Uani 1 1 d . . .

H1 H 0.4275 0.4822 0.3787 0.024 Uiso 1 1 calc R . .

C1 C 0.42775(10) 0.42263(18) 0.23021(17) 0.0256(6) Uani 1 1 d . . .

H8 H 0.4402 0.4825 0.2352 0.031 Uiso 1 1 calc R . .

C2 C 0.42112(11) 0.36230(18) 0.16394(17) 0.0259(6) Uani 1 1 d . . .

C3 C 0.42855(12) 0.3851(2) 0.0890(2) 0.0370(7) Uani 1 1 d . . .

C4 C 0.40189(10) 0.28056(17) 0.18418(17) 0.0233(6) Uani 1 1 d . . .

C5 C 0.38782(12) 0.18925(19) 0.13654(18) 0.0320(6) Uani 1 1 d . . .

C6 C 0.41599(16) 0.1801(2) 0.0771(2) 0.0488(9) Uani 1 1 d . . .

H1A H 0.4016 0.2257 0.0316 0.073 Uiso 1 1 calc R . .

H1B H 0.4086 0.1207 0.0505 0.073 Uiso 1 1 calc R . .

H1C H 0.4555 0.1882 0.1120 0.073 Uiso 1 1 calc R . .

C7 C 0.32430(13) 0.1837(2) 0.0797(2) 0.0474(8) Uani 1 1 d . . .

H2A H 0.3067 0.1875 0.1172 0.071 Uiso 1 1 calc R . .

H2B H 0.3147 0.1269 0.0481 0.071 Uiso 1 1 calc R . .

H2C H 0.3118 0.2332 0.0381 0.071 Uiso 1 1 calc R . .

C8 C 0.40830(13) 0.11188(19) 0.2042(2) 0.0384(7) Uani 1 1 d . . .

H4A H 0.4480 0.1162 0.2395 0.058 Uiso 1 1 calc R . .

H4B H 0.3990 0.0544 0.1739 0.058 Uiso 1 1 calc R . .

H4C H 0.3908 0.1164 0.2418 0.058 Uiso 1 1 calc R . .

C9 C 0.31883(10) 0.51893(16) 0.31453(16) 0.0222(5) Uani 1 1 d . . .

H16 H 0.3353 0.5762 0.3228 0.027 Uiso 1 1 calc R . .

C10 C 0.26260(10) 0.50171(16) 0.28106(17) 0.0226(5) Uani 1 1 d . . .

C11 C 0.27775(11) 0.07246(17) 0.25152(17) 0.0243(6) Uani 1 1 d . . .

C12 C 0.25748(10) 0.40550(16) 0.28108(16) 0.0225(5) Uani 1 1 d . . .

C13 C 0.20632(10) 0.34608(17) 0.25325(19) 0.0287(6) Uani 1 1 d . . .

C14 C 0.15583(12) 0.4048(2) 0.2386(3) 0.0615(11) Uani 1 1 d . . .

H17A H 0.1648 0.4408 0.2905 0.092 Uiso 1 1 calc R . .

H17B H 0.1247 0.3660 0.2274 0.092 Uiso 1 1 calc R . .

H17C H 0.1464 0.4443 0.1888 0.092 Uiso 1 1 calc R . .

C15 C 0.21574(12) 0.27669(19) 0.3258(2) 0.0355(7) Uani 1 1 d . . .

H19A H 0.2483 0.2411 0.3383 0.053 Uiso 1 1 calc R . .

H19B H 0.1839 0.2372 0.3062 0.053 Uiso 1 1 calc R . .

H19C H 0.2209 0.3081 0.3785 0.053 Uiso 1 1 calc R . .

C16 C 0.19511(13) 0.2972(2) 0.1672(2) 0.0453(8) Uani 1 1 d . . .

H20A H 0.1892 0.3415 0.1222 0.068 Uiso 1 1 calc R . .

H20B H 0.1625 0.2598 0.1483 0.068 Uiso 1 1 calc R . .

H20C H 0.2265 0.2598 0.1771 0.068 Uiso 1 1 calc R . .

C17 C 0.47316(10) 0.37897(17) 0.52435(16) 0.0224(5) Uani 1 1 d . . .

H14 H 0.4921 0.4341 0.5422 0.027 Uiso 1 1 calc R . .

C18 C 0.48324(10) 0.30215(17) 0.57659(16) 0.0231(5) Uani 1 1 d . . .

C19 C 0.52633(11) 0.29896(19) 0.66551(19) 0.0318(6) Uani 1 1 d . . .

C20 C 0.44446(10) 0.23608(17) 0.52152(16) 0.0219(5) Uani 1 1 d . . .

C21 C 0.43442(11) 0.13831(17) 0.53901(17) 0.0278(6) Uani 1 1 d . . .

C22 C 0.47764(15) 0.1083(2) 0.6307(2) 0.0587(11) Uani 1 1 d . . .

H13A H 0.5141 0.1120 0.6346 0.088 Uiso 1 1 calc R . .

H13B H 0.4703 0.0467 0.6409 0.088 Uiso 1 1 calc R . .

H13C H 0.4758 0.1474 0.6745 0.088 Uiso 1 1 calc R . .

C23 C 0.43835(14) 0.07684(19) 0.4695(2) 0.0411(8) Uani 1 1 d . . .

H10A H 0.4103 0.0942 0.4116 0.062 Uiso 1 1 calc R . .

H10B H 0.4327 0.0146 0.4807 0.062 Uiso 1 1 calc R . .

H10C H 0.4745 0.0833 0.4727 0.062 Uiso 1 1 calc R . .

C24 C 0.37605(13) 0.1306(2) 0.5317(2) 0.0460(8) Uani 1 1 d . . .

H12A H 0.3742 0.1663 0.5774 0.069 Uiso 1 1 calc R . .

H12B H 0.3683 0.0680 0.5381 0.069 Uiso 1 1 calc R . .

H12C H 0.3490 0.1527 0.4748 0.069 Uiso 1 1 calc R . .

C101 C 0.34205(16) 0.3974(3) 0.5484(3) 0.0664(11) Uani 1 1 d U . .

H10D H 0.3617 0.4400 0.5302 0.100 Uiso 1 1 calc R . .

H10E H 0.3272 0.3493 0.5055 0.100 Uiso 1 1 calc R . .

H10F H 0.3672 0.3722 0.6049 0.100 Uiso 1 1 calc R . .

C102 C 0.2977(2) 0.4431(4) 0.5550(4) 0.0896(15) Uani 1 1 d U . .

Cu1 Cu 0.349437(12) 0.241444(19) 0.31952(2) 0.02190(10) Uani 1 1 d . . .

N1 N 0.41340(8) 0.38065(13) 0.28559(13) 0.0204(4) Uani 1 1 d . . .

N2 N 0.39637(8) 0.29332(13) 0.25751(13) 0.0218(5) Uani 1 1 d . . .

N3 N 0.43271(13) 0.4076(2) 0.0282(2) 0.0560(8) Uani 1 1 d . . .

N4 N 0.34530(8) 0.43985(13) 0.33278(13) 0.0196(4) Uani 1 1 d . . .

N5 N 0.30819(8) 0.36872(13) 0.31152(13) 0.0199(4) Uani 1 1 d . . .

N6 N 0.30650(9) 0.13430(14) 0.27750(14) 0.0250(5) Uani 1 1 d . . .

N7 N 0.43186(8) 0.36081(13) 0.44431(13) 0.0191(4) Uani 1 1 d . . .

N8 N 0.41349(8) 0.27295(13) 0.44175(13) 0.0197(4) Uani 1 1 d . . .

N9 N 0.56219(11) 0.3019(2) 0.73620(17) 0.0478(7) Uani 1 1 d . . .

N101 N 0.2631(3) 0.4803(5) 0.5616(5) 0.175(3) Uani 1 1 d U . .

 

loop_

 _atom_site_aniso_label

 _atom_site_aniso_U_11

 _atom_site_aniso_U_22

 _atom_site_aniso_U_33

 _atom_site_aniso_U_23

 _atom_site_aniso_U_13

 _atom_site_aniso_U_12

B1 0.0192(14) 0.0144(13) 0.0224(15) 0.0006(11) 0.0059(12) -0.0045(11)

C1 0.0238(14) 0.0234(14) 0.0301(15) 0.0046(11) 0.0128(12) -0.0046(11)

C2 0.0233(14) 0.0303(15) 0.0256(14) 0.0036(11) 0.0127(12) 0.0000(11)

C3 0.0397(17) 0.0363(17) 0.0438(19) 0.0026(14) 0.0267(15) -0.0042(13)

C4 0.0193(13) 0.0257(14) 0.0222(13) 0.0032(10) 0.0073(11) 0.0025(10)

C5 0.0391(17) 0.0321(16) 0.0279(15) -0.0056(12) 0.0181(13) -0.0012(13)

C6 0.076(2) 0.0404(19) 0.046(2) -0.0059(15) 0.0421(19) 0.0031(17)

C7 0.046(2) 0.047(2) 0.0381(18) -0.0160(15) 0.0105(15) -0.0123(16)

C8 0.054(2) 0.0276(16) 0.0440(18) -0.0028(13) 0.0315(16) 0.0003(14)

C9 0.0257(14) 0.0135(12) 0.0236(14) 0.0006(10) 0.0082(11) -0.0009(10)

C10 0.0237(13) 0.0157(12) 0.0250(13) 0.0019(10) 0.0083(11) 0.0030(10)

C11 0.0247(14) 0.0178(13) 0.0275(15) -0.0008(11) 0.0096(12) 0.0020(11)

C12 0.0215(13) 0.0189(13) 0.0224(13) 0.0012(10) 0.0064(11) 0.0013(10)

C13 0.0171(13) 0.0168(13) 0.0424(17) 0.0045(11) 0.0055(12) 0.0009(10)

C14 0.0220(16) 0.0277(17) 0.122(3) 0.0097(19) 0.0222(19) 0.0012(13)

C15 0.0302(15) 0.0279(15) 0.0505(19) 0.0017(13) 0.0204(14) -0.0032(12)

C16 0.0423(19) 0.0347(17) 0.0341(18) 0.0022(14) -0.0032(14) -0.0135(14)

C17 0.0180(12) 0.0228(13) 0.0226(14) -0.0033(10) 0.0061(11) -0.0047(10)

C18 0.0199(13) 0.0260(14) 0.0179(13) -0.0001(10) 0.0042(11) -0.0032(10)

C19 0.0274(15) 0.0327(16) 0.0289(16) 0.0014(12) 0.0076(13) -0.0034(12)

C20 0.0201(12) 0.0249(13) 0.0194(12) 0.0031(10) 0.0081(10) 0.0018(10)

C21 0.0293(15) 0.0221(14) 0.0246(14) 0.0071(11) 0.0061(12) -0.0010(11)

C22 0.067(2) 0.0389(19) 0.0358(19) 0.0176(15) -0.0058(17) -0.0113(17)

C23 0.053(2) 0.0193(14) 0.0446(19) 0.0040(13) 0.0168(16) 0.0069(13)

C24 0.051(2) 0.0350(18) 0.061(2) 0.0102(15) 0.0329(18) -0.0075(15)

C101 0.056(2) 0.073(3) 0.072(3) 0.000(2) 0.031(2) -0.002(2)

C102 0.074(3) 0.083(4) 0.111(4) 0.018(3) 0.042(3) 0.013(3)

Cu1 0.02232(16) 0.01536(16) 0.02289(17) -0.00133(13) 0.00611(12) -0.00426(13)

N1 0.0191(11) 0.0169(10) 0.0219(11) 0.0011(8) 0.0068(9) -0.0037(8)

N2 0.0250(11) 0.0172(11) 0.0232(11) -0.0016(9) 0.0111(9) -0.0019(9)

N3 0.081(2) 0.0502(18) 0.060(2) 0.0061(15) 0.0521(18) -0.0036(16)

N4 0.0201(11) 0.0115(10) 0.0223(11) -0.0002(8) 0.0057(9) -0.0019(8)

N5 0.0179(10) 0.0138(10) 0.0237(11) -0.0002(8) 0.0058(9) -0.0020(8)

N6 0.0236(11) 0.0150(11) 0.0321(13) -0.0001(9) 0.0093(10) -0.0008(9)

N7 0.0185(11) 0.0152(10) 0.0195(11) -0.0001(8) 0.0052(9) -0.0037(8)

N8 0.0206(11) 0.0141(10) 0.0214(11) 0.0008(8) 0.0071(9) -0.0019(8)

N9 0.0358(15) 0.0600(18) 0.0278(15) 0.0012(13) -0.0020(12) -0.0054(13)

N101 0.130(5) 0.188(6) 0.230(7) 0.030(5) 0.102(5) 0.075(5)

 

_geom_special_details

;

 All esds (except the esd in the dihedral angle between two l.s. planes)

 are estimated using the full covariance matrix.  The cell esds are taken

 into account individually in the estimation of esds in distances, angles

 and torsion angles; correlations between esds in cell parameters are only

 used when they are defined by crystal symmetry.  An approximate (isotropic)

 treatment of cell esds is used for estimating esds involving l.s. planes.

;

 

loop_

 _geom_bond_atom_site_label_1

 _geom_bond_atom_site_label_2

 _geom_bond_distance

 _geom_bond_site_symmetry_2

 _geom_bond_publ_flag

B1 N7 1.533(3) . ?

B1 N1 1.537(3) . ?

B1 N4 1.541(3) . ?

B1 H1 0.9800 . ?

C1 N1 1.327(3) . ?

C1 C2 1.380(4) . ?

C1 H8 0.9300 . ?

C2 C4 1.413(3) . ?

C2 C3 1.422(4) . ?

C3 N3 1.142(4) . ?

C4 N2 1.338(3) . ?

C4 C5 1.521(4) . ?

C5 C8 1.528(4) . ?

C5 C6 1.530(4) . ?

C5 C7 1.537(4) . ?

C6 H1A 0.9600 . ?

C6 H1B 0.9600 . ?

C6 H1C 0.9600 . ?

C7 H2A 0.9600 . ?

C7 H2B 0.9600 . ?

C7 H2C 0.9600 . ?

C8 H4A 0.9600 . ?

C8 H4B 0.9600 . ?

C8 H4C 0.9600 . ?

C9 N4 1.323(3) . ?

C9 C10 1.380(3) . ?

C9 H16 0.9300 . ?

C10 C12 1.419(3) . ?

C10 C11 1.421(3) 4 ?

C11 N6 1.143(3) . ?

C11 C10 1.421(3) 4_545 ?

C12 N5 1.337(3) . ?

C12 C13 1.515(3) . ?

C13 C15 1.530(4) . ?

C13 C16 1.531(4) . ?

C13 C14 1.536(4) . ?

C14 H17A 0.9600 . ?

C14 H17B 0.9600 . ?

C14 H17C 0.9600 . ?

C15 H19A 0.9600 . ?

C15 H19B 0.9600 . ?

C15 H19C 0.9600 . ?

C16 H20A 0.9600 . ?

C16 H20B 0.9600 . ?

C16 H20C 0.9600 . ?

C17 N7 1.330(3) . ?

C17 C18 1.383(3) . ?

C17 H14 0.9300 . ?

C18 C20 1.418(3) . ?

C18 C19 1.422(4) . ?

C19 N9 1.146(3) . ?

C20 N8 1.337(3) . ?

C20 C21 1.515(3) . ?

C21 C22 1.520(4) . ?

C21 C23 1.531(4) . ?

C21 C24 1.531(4) . ?

C22 H13A 0.9600 . ?

C22 H13B 0.9600 . ?

C22 H13C 0.9600 . ?

C23 H10A 0.9600 . ?

C23 H10B 0.9600 . ?

C23 H10C 0.9600 . ?

C24 H12A 0.9600 . ?

C24 H12B 0.9600 . ?

C24 H12C 0.9600 . ?

C101 C102 1.426(6) . ?

C101 H10D 0.9600 . ?

C101 H10E 0.9600 . ?

C101 H10F 0.9600 . ?

C102 N101 1.133(6) . ?

Cu1 N6 1.888(2) . ?

Cu1 N8 2.053(2) . ?

Cu1 N2 2.135(2) . ?

Cu1 N5 2.148(2) . ?

N1 N2 1.371(3) . ?

N4 N5 1.376(3) . ?

N7 N8 1.376(3) . ?

 

loop_

 _geom_angle_atom_site_label_1

 _geom_angle_atom_site_label_2

 _geom_angle_atom_site_label_3

 _geom_angle

 _geom_angle_site_symmetry_1

 _geom_angle_site_symmetry_3

 _geom_angle_publ_flag

N7 B1 N1 110.9(2) . . ?

N7 B1 N4 109.8(2) . . ?

N1 B1 N4 107.75(19) . . ?

N7 B1 H1 109.4 . . ?

N1 B1 H1 109.4 . . ?

N4 B1 H1 109.4 . . ?

N1 C1 C2 108.3(2) . . ?

N1 C1 H8 125.8 . . ?

C2 C1 H8 125.8 . . ?

C1 C2 C4 105.6(2) . . ?

C1 C2 C3 124.4(2) . . ?

C4 C2 C3 129.9(3) . . ?

N3 C3 C2 176.2(3) . . ?

N2 C4 C2 108.8(2) . . ?

N2 C4 C5 120.9(2) . . ?

C2 C4 C5 130.3(2) . . ?

C4 C5 C8 109.8(2) . . ?

C4 C5 C6 110.6(2) . . ?

C8 C5 C6 108.5(2) . . ?

C4 C5 C7 108.3(2) . . ?

C8 C5 C7 110.2(3) . . ?

C6 C5 C7 109.5(3) . . ?

C5 C6 H1A 109.5 . . ?

C5 C6 H1B 109.5 . . ?

H1A C6 H1B 109.5 . . ?

C5 C6 H1C 109.5 . . ?

H1A C6 H1C 109.5 . . ?

H1B C6 H1C 109.5 . . ?

C5 C7 H2A 109.5 . . ?

C5 C7 H2B 109.5 . . ?

H2A C7 H2B 109.5 . . ?

C5 C7 H2C 109.5 . . ?

H2A C7 H2C 109.5 . . ?

H2B C7 H2C 109.5 . . ?

C5 C8 H4A 109.5 . . ?

C5 C8 H4B 109.5 . . ?

H4A C8 H4B 109.5 . . ?

C5 C8 H4C 109.5 . . ?

H4A C8 H4C 109.5 . . ?

H4B C8 H4C 109.5 . . ?

N4 C9 C10 108.1(2) . . ?

N4 C9 H16 126.0 . . ?

C10 C9 H16 126.0 . . ?

C9 C10 C12 105.8(2) . . ?

C9 C10 C11 122.0(2) . 4 ?

C12 C10 C11 132.0(2) . 4 ?

N6 C11 C10 173.9(3) . 4_545 ?

N5 C12 C10 108.6(2) . . ?

N5 C12 C13 121.0(2) . . ?

C10 C12 C13 130.4(2) . . ?

C12 C13 C15 110.1(2) . . ?

C12 C13 C16 108.4(2) . . ?

C15 C13 C16 110.3(2) . . ?

C12 C13 C14 110.2(2) . . ?

C15 C13 C14 107.9(3) . . ?

C16 C13 C14 109.9(3) . . ?

C13 C14 H17A 109.5 . . ?

C13 C14 H17B 109.5 . . ?

H17A C14 H17B 109.5 . . ?

C13 C14 H17C 109.5 . . ?

H17A C14 H17C 109.5 . . ?

H17B C14 H17C 109.5 . . ?

C13 C15 H19A 109.5 . . ?

C13 C15 H19B 109.5 . . ?

H19A C15 H19B 109.5 . . ?

C13 C15 H19C 109.5 . . ?

H19A C15 H19C 109.5 . . ?

H19B C15 H19C 109.5 . . ?

C13 C16 H20A 109.5 . . ?

C13 C16 H20B 109.5 . . ?

H20A C16 H20B 109.5 . . ?

C13 C16 H20C 109.5 . . ?

H20A C16 H20C 109.5 . . ?

H20B C16 H20C 109.5 . . ?

N7 C17 C18 108.6(2) . . ?

N7 C17 H14 125.7 . . ?

C18 C17 H14 125.7 . . ?

C17 C18 C20 105.5(2) . . ?

C17 C18 C19 122.2(2) . . ?

C20 C18 C19 132.3(2) . . ?

N9 C19 C18 175.5(3) . . ?

N8 C20 C18 108.6(2) . . ?

N8 C20 C21 119.9(2) . . ?

C18 C20 C21 131.5(2) . . ?

C20 C21 C22 110.7(2) . . ?

C20 C21 C23 108.8(2) . . ?

C22 C21 C23 109.1(3) . . ?

C20 C21 C24 109.0(2) . . ?

C22 C21 C24 109.7(3) . . ?

C23 C21 C24 109.4(2) . . ?

C21 C22 H13A 109.5 . . ?

C21 C22 H13B 109.5 . . ?

H13A C22 H13B 109.5 . . ?

C21 C22 H13C 109.5 . . ?

H13A C22 H13C 109.5 . . ?

H13B C22 H13C 109.5 . . ?

C21 C23 H10A 109.5 . . ?

C21 C23 H10B 109.5 . . ?

H10A C23 H10B 109.5 . . ?

C21 C23 H10C 109.5 . . ?

H10A C23 H10C 109.5 . . ?

H10B C23 H10C 109.5 . . ?

C21 C24 H12A 109.5 . . ?

C21 C24 H12B 109.5 . . ?

H12A C24 H12B 109.5 . . ?

C21 C24 H12C 109.5 . . ?

H12A C24 H12C 109.5 . . ?

H12B C24 H12C 109.5 . . ?

C102 C101 H10D 109.5 . . ?

C102 C101 H10E 109.5 . . ?

H10D C101 H10E 109.5 . . ?

C102 C101 H10F 109.5 . . ?

H10D C101 H10F 109.5 . . ?

H10E C101 H10F 109.5 . . ?

N101 C102 C101 178.7(7) . . ?

N6 Cu1 N8 130.91(8) . . ?

N6 Cu1 N2 120.84(9) . . ?

N8 Cu1 N2 90.26(8) . . ?

N6 Cu1 N5 119.28(8) . . ?

N8 Cu1 N5 92.23(8) . . ?

N2 Cu1 N5 94.01(8) . . ?

C1 N1 N2 110.4(2) . . ?

C1 N1 B1 126.9(2) . . ?

N2 N1 B1 122.23(19) . . ?

C4 N2 N1 106.96(19) . . ?

C4 N2 Cu1 139.62(17) . . ?

N1 N2 Cu1 109.99(14) . . ?

C9 N4 N5 110.69(19) . . ?

C9 N4 B1 127.2(2) . . ?

N5 N4 B1 121.74(18) . . ?

C12 N5 N4 106.85(19) . . ?

C12 N5 Cu1 141.84(17) . . ?

N4 N5 Cu1 110.36(14) . . ?

C11 N6 Cu1 175.8(2) . . ?

C17 N7 N8 109.90(19) . . ?

C17 N7 B1 127.5(2) . . ?

N8 N7 B1 122.60(19) . . ?

C20 N8 N7 107.44(19) . . ?

C20 N8 Cu1 141.05(17) . . ?

N7 N8 Cu1 111.51(14) . . ?

 

_diffrn_measured_fraction_theta_max    0.997

_diffrn_reflns_theta_full              26.00

_diffrn_measured_fraction_theta_full   0.997

_refine_diff_density_max    0.389

_refine_diff_density_min   -0.357

_refine_diff_density_rms    0.059

#===END
